# Supplementary material for: Using phylogenetically-informed annotation (PIA) to search for light-interacting genes in transcriptomes from non-model organisms
Source: PubMed Central journal article supplement (PMC4255452; doi:10.1186/s12859-014-0350-x), 2014-11-19

# Tree File: *eya*

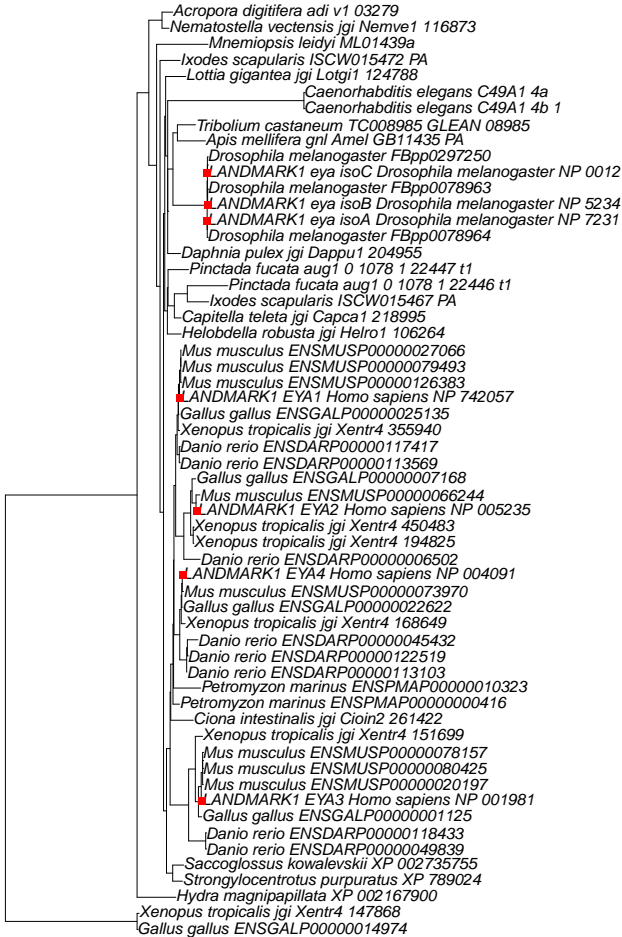



# Tree File: ey\_toy

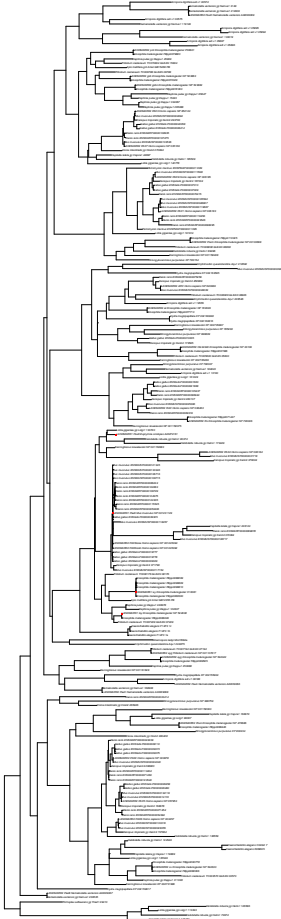

# Tree File: ovo

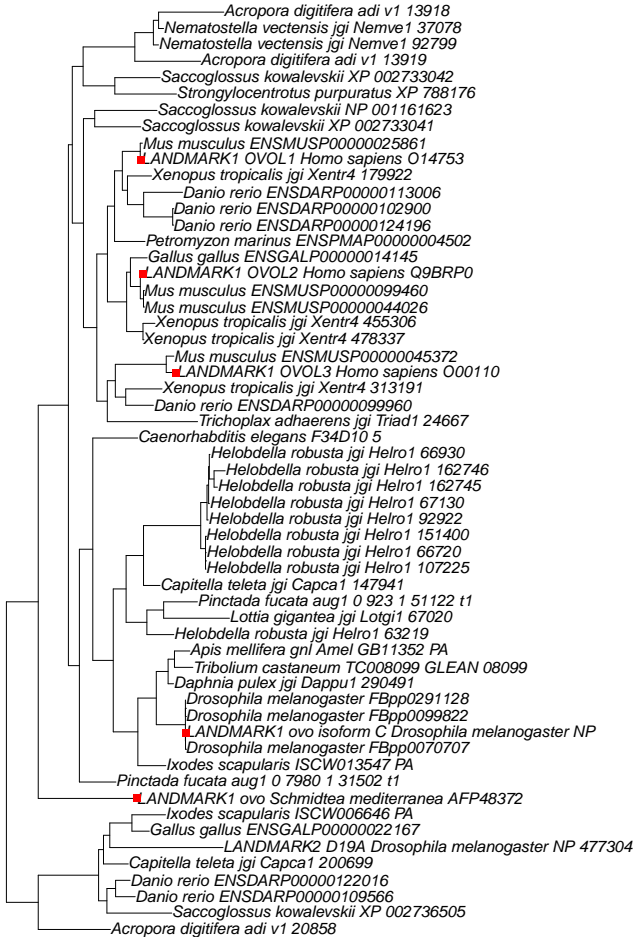



# Tree File: so

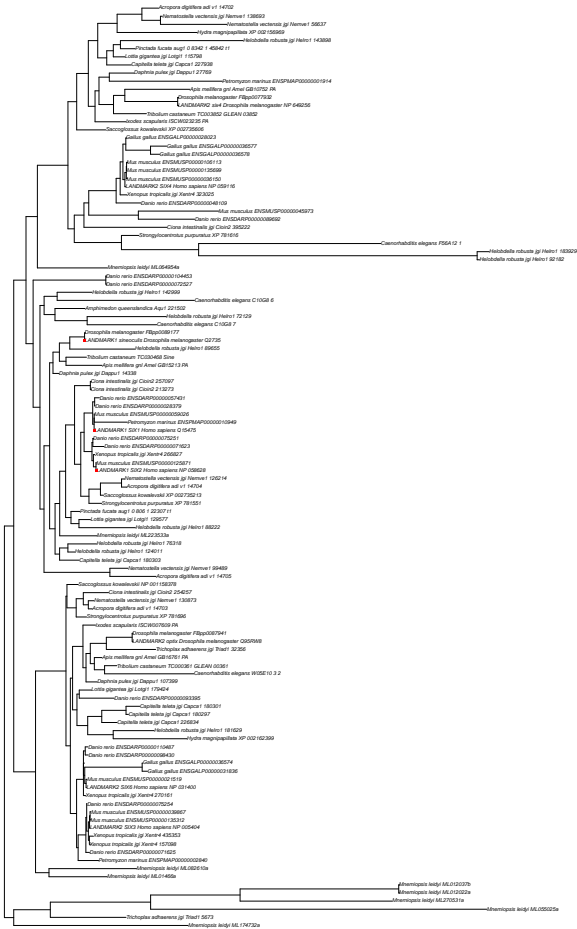

# Tree File: rx

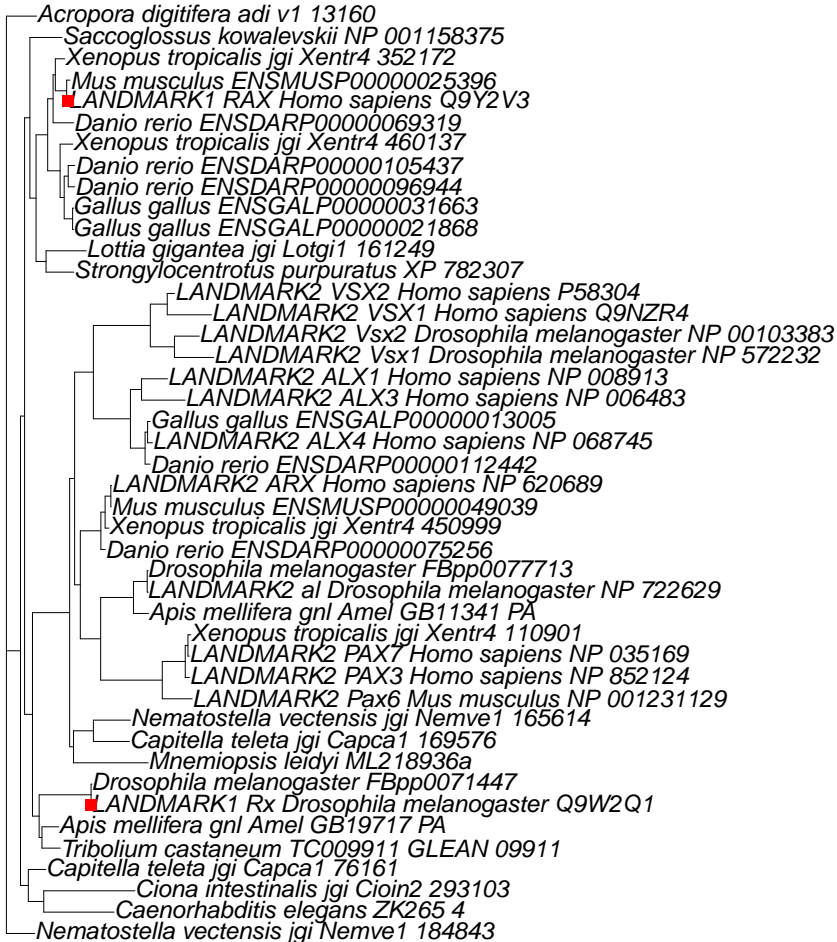

# Tree File: dac

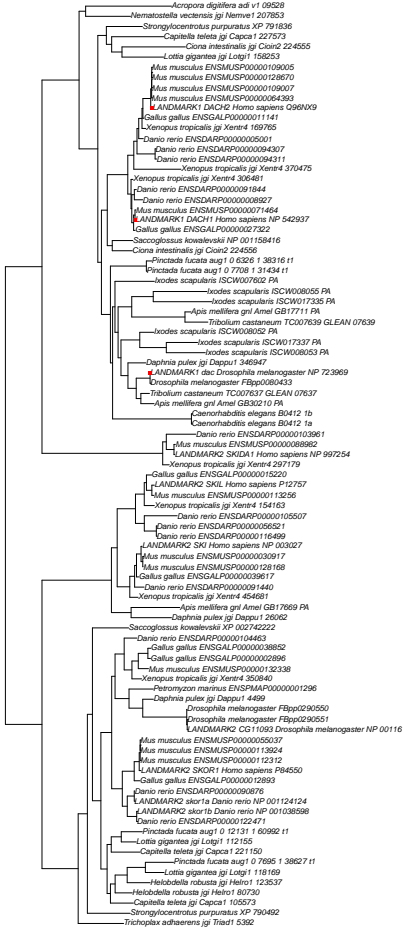



# Tree File: vsx

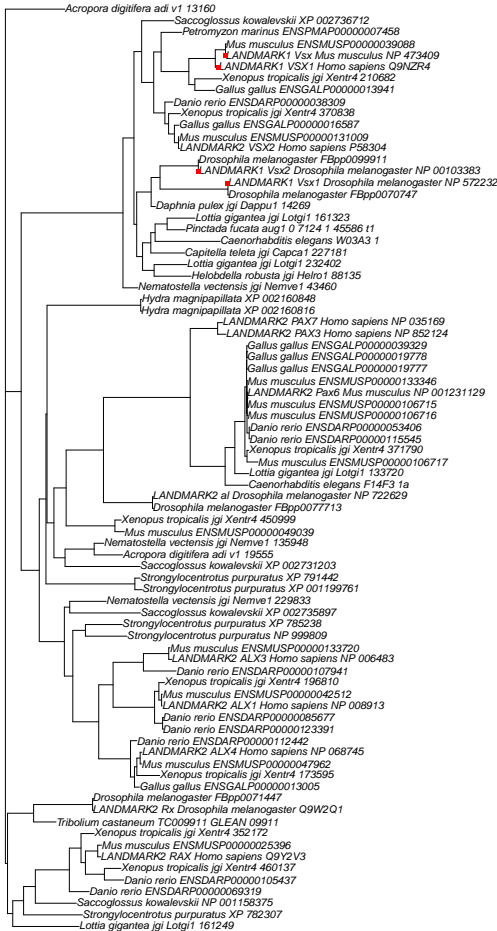

# Tree File: oc

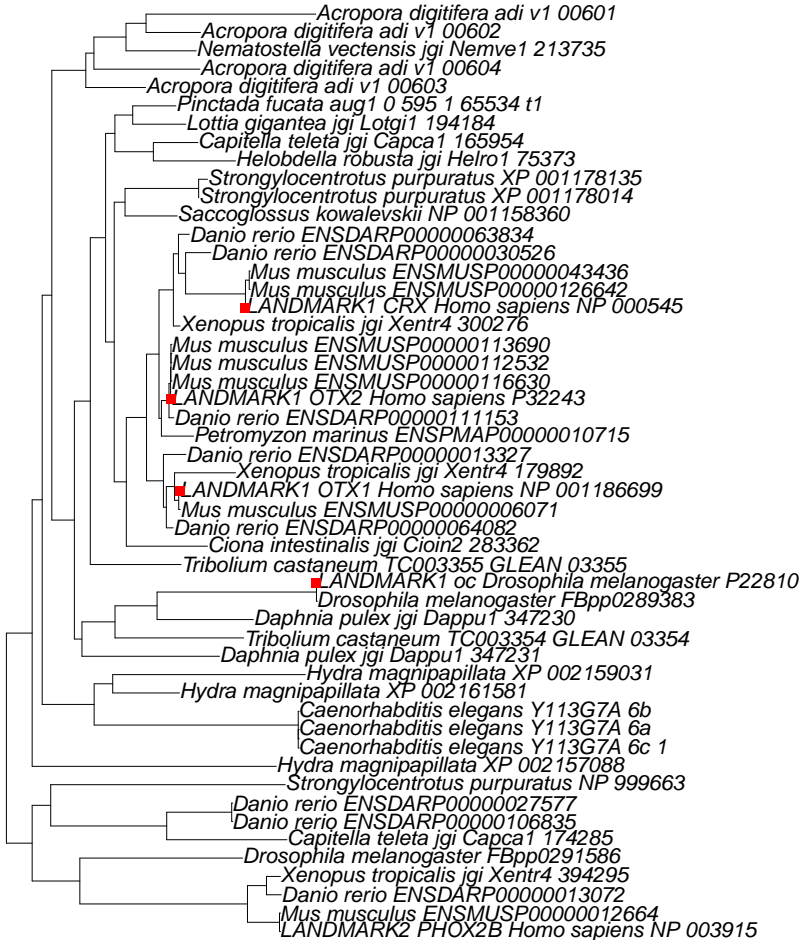

# Tree File: glass

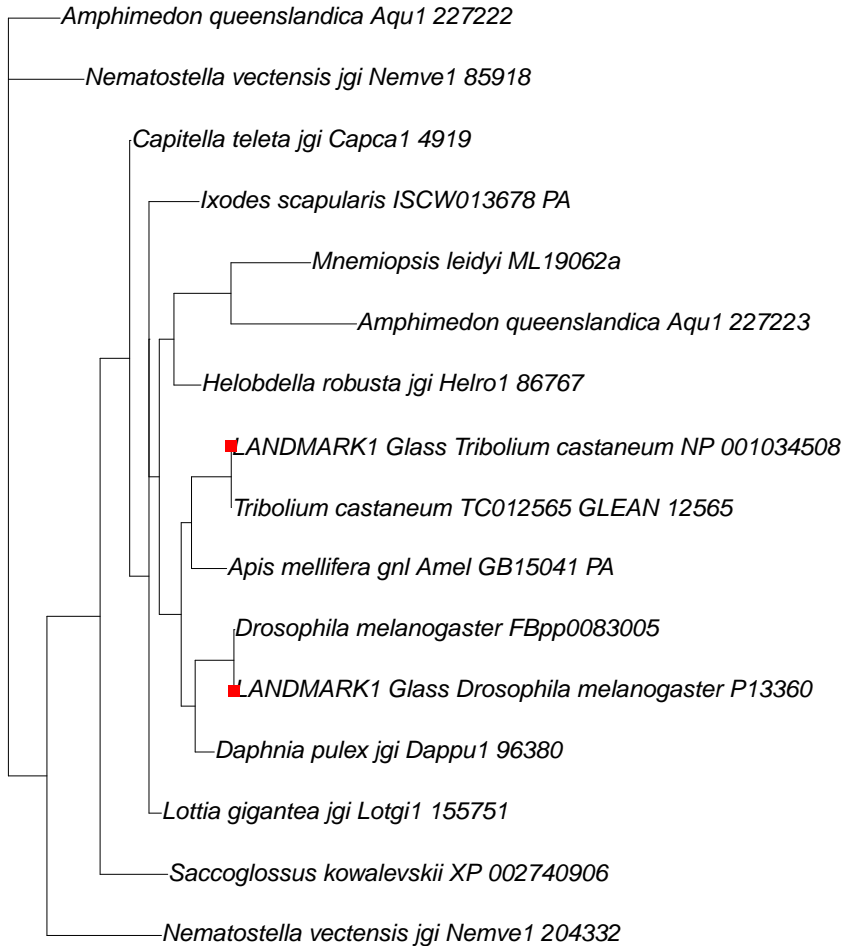

# Tree File: pph13

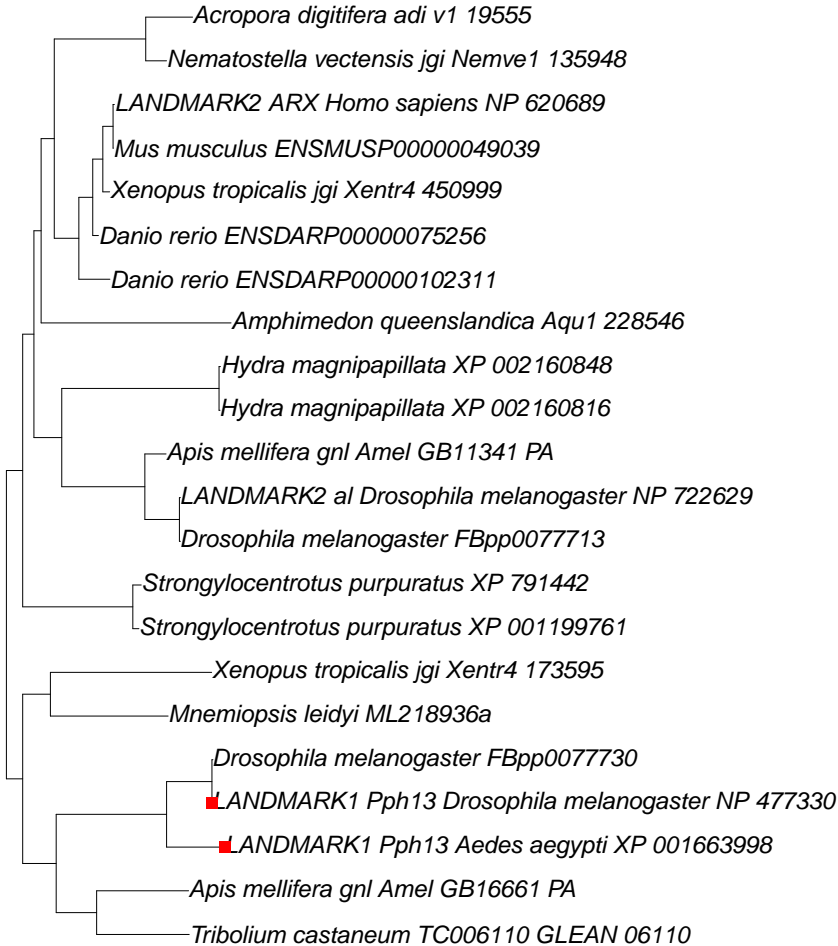

# Tree File: notch

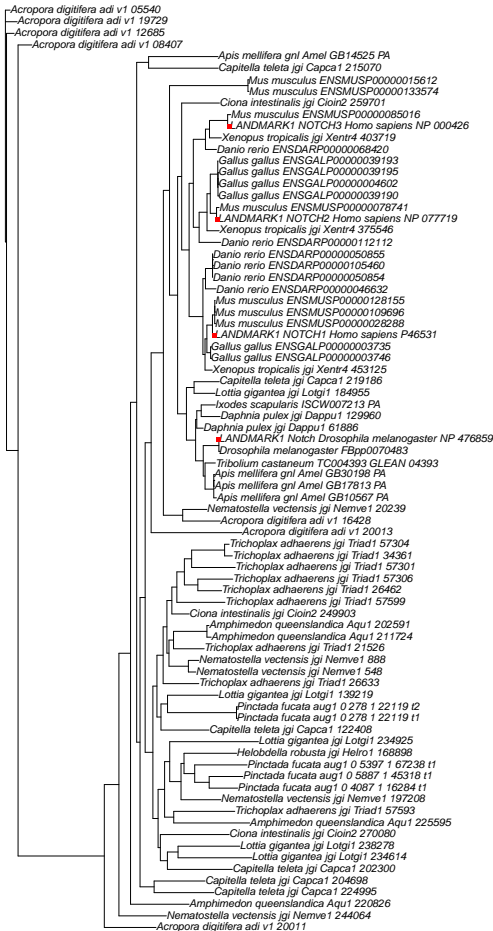



# Tree File: en

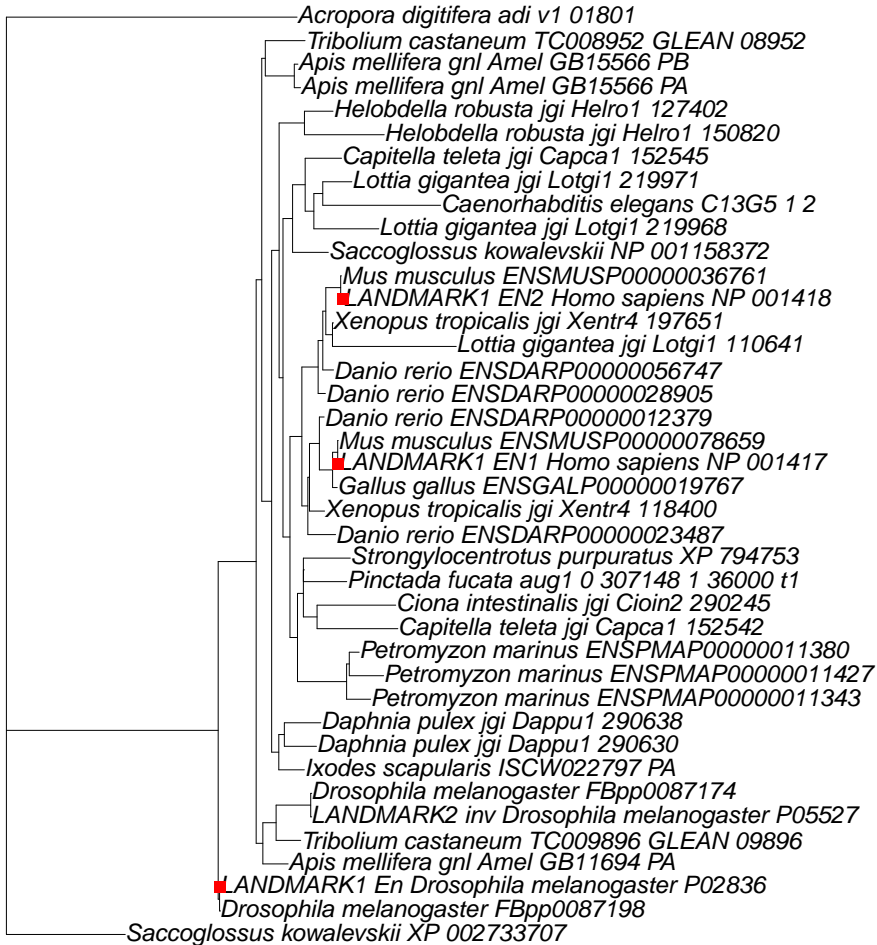

# Tree File: dpp

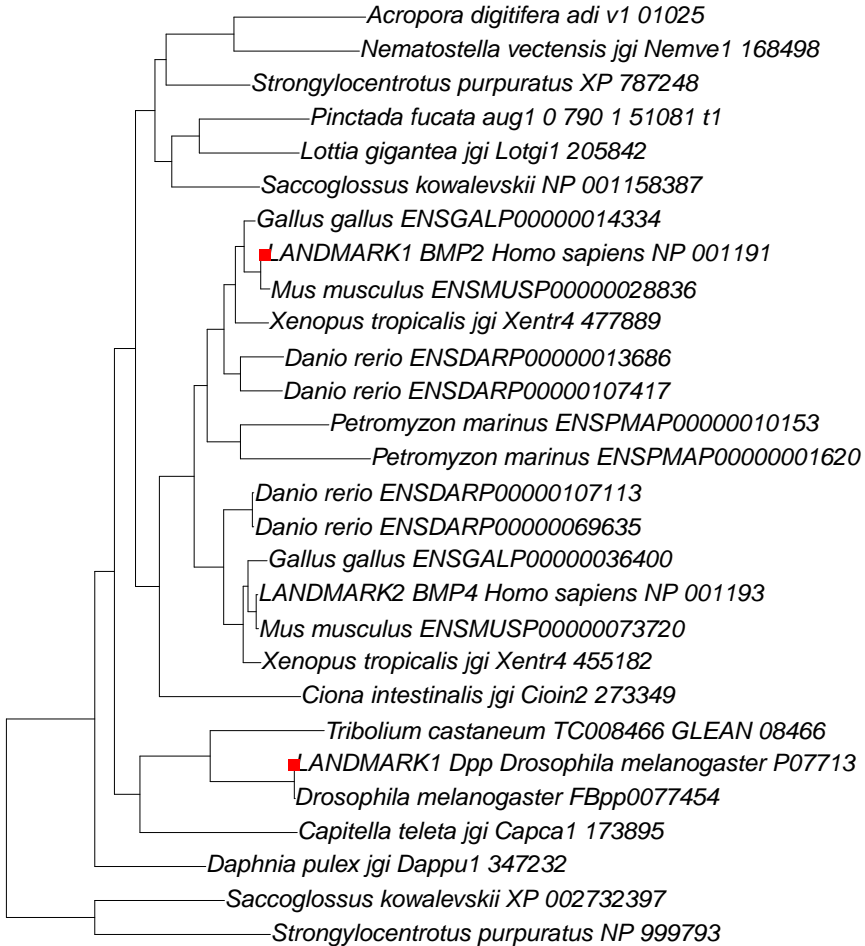



# Tree File: wnt1

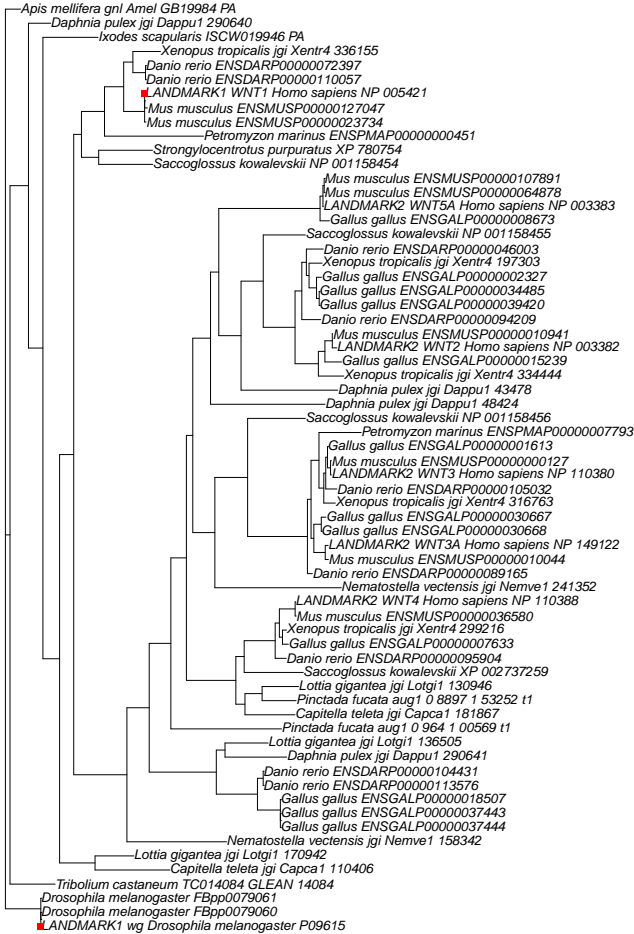

# Tree File: hh

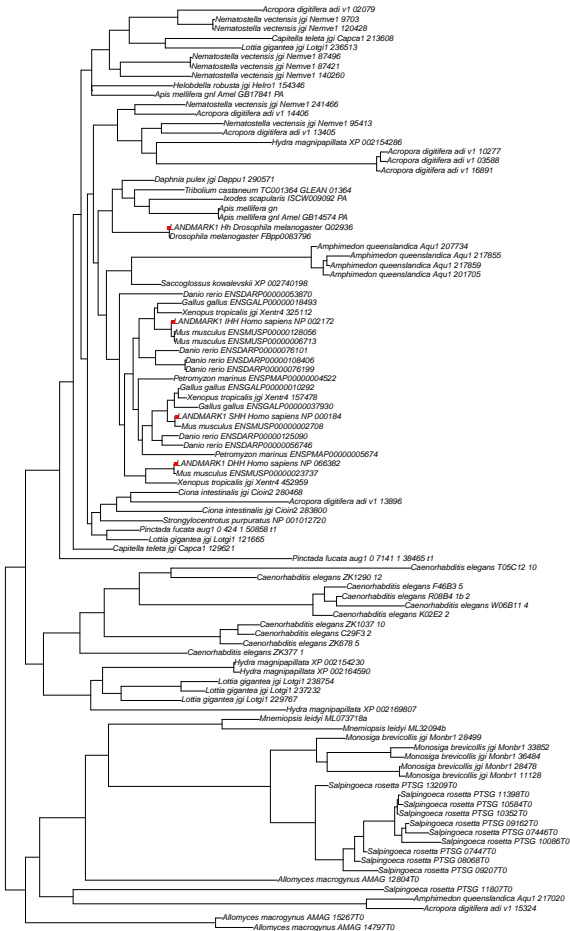

# Tree File: r\_opsin

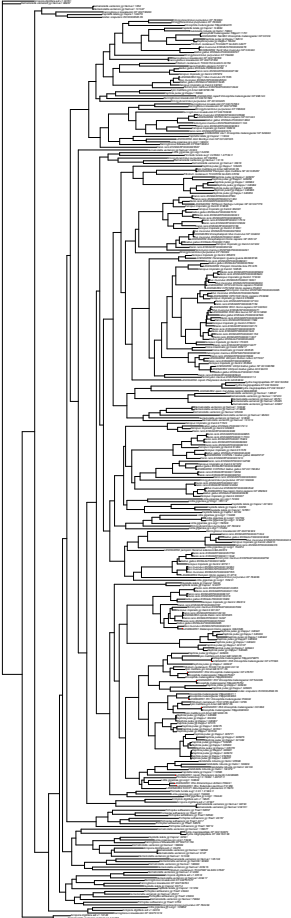

# Tree File: trp

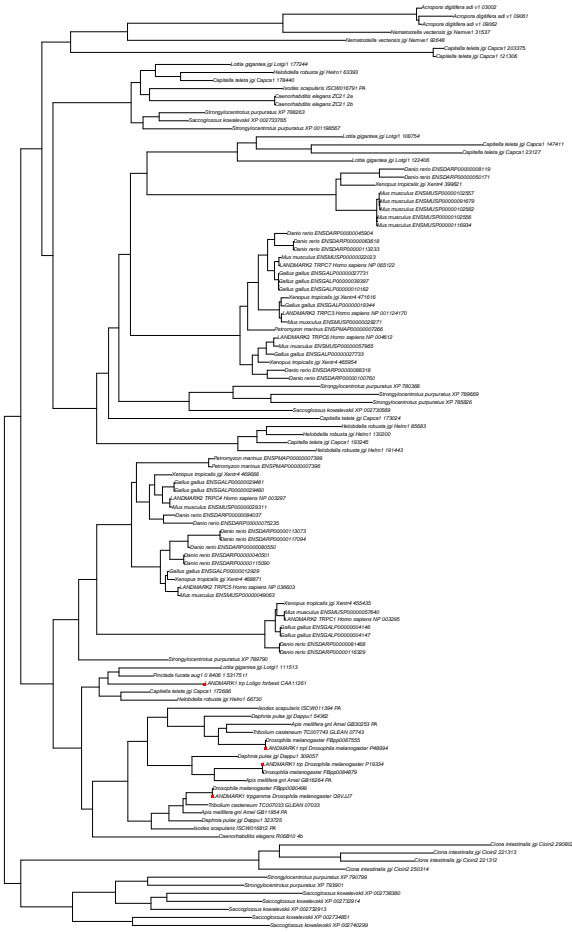

# Tree File: Gq\_beta

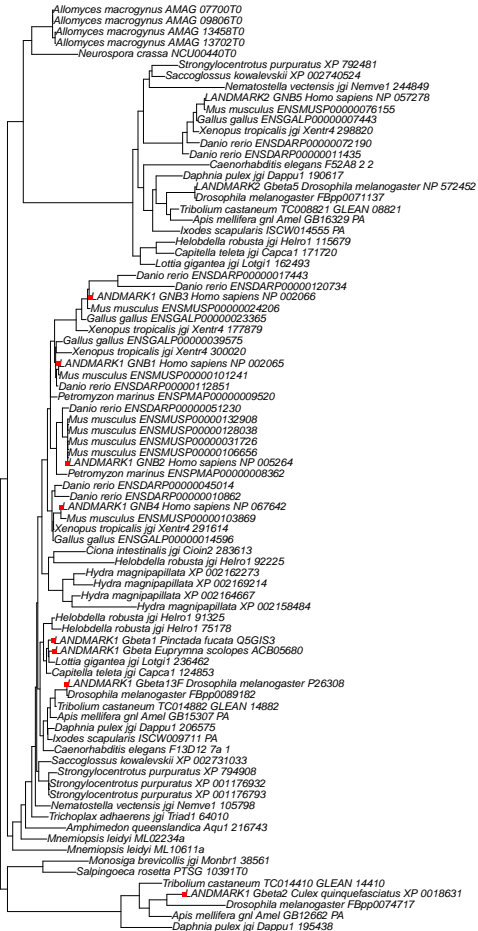

# Tree File: rdgB

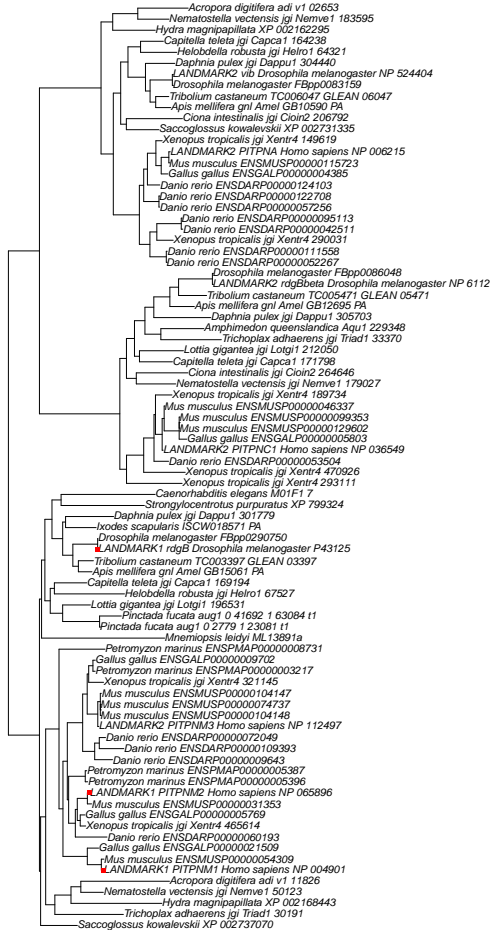

# Tree File: PLC

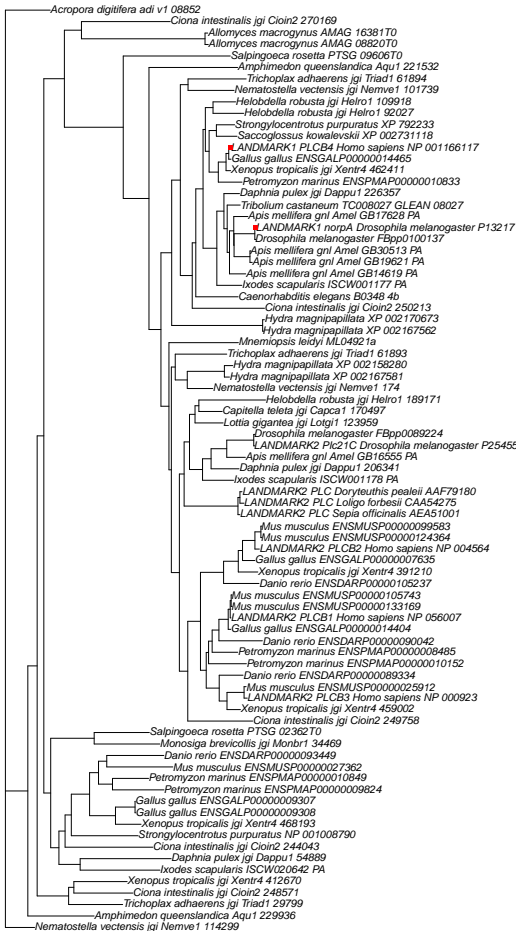

# Tree File: Gprk2

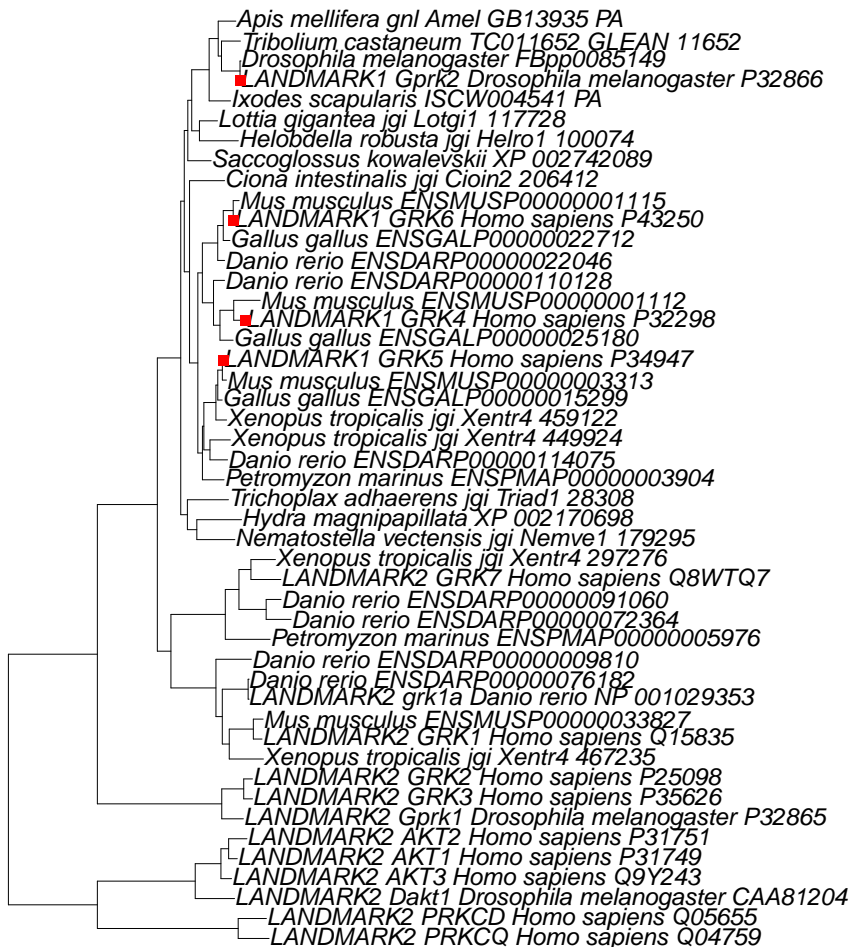



# Tree File: Gq\_gamma

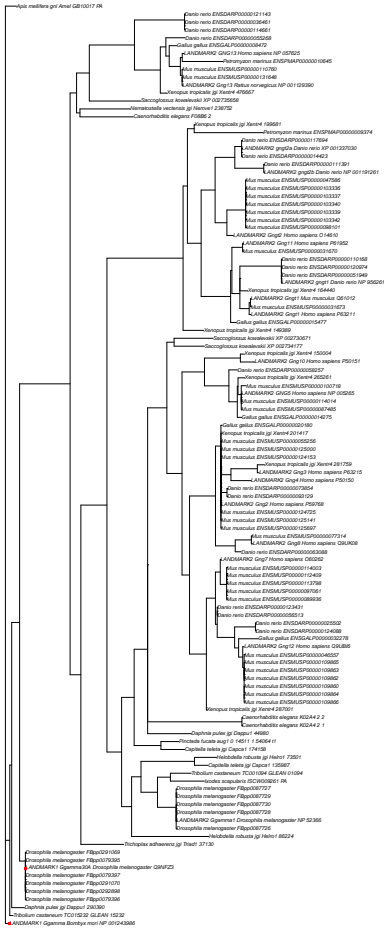

# Tree File: Gq\_alpha

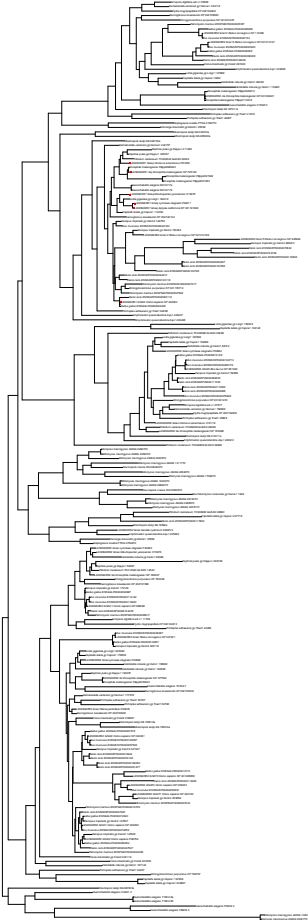

# Tree File: Gprk1

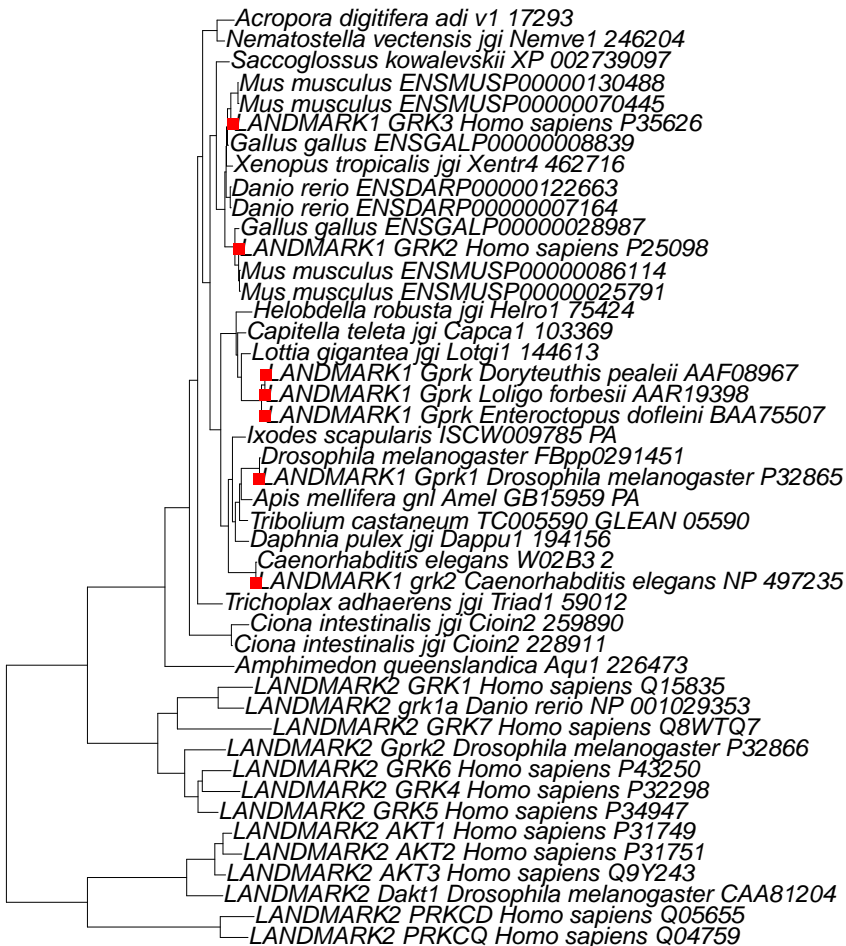

# Tree File: DAGK

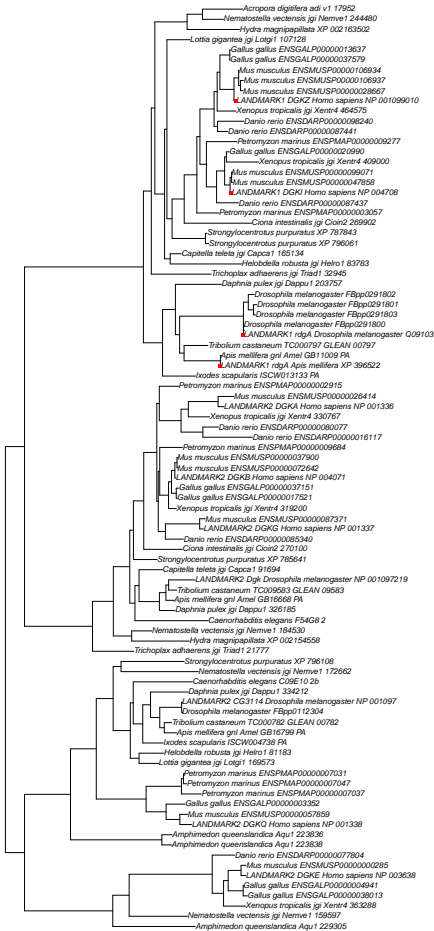

# Tree File: Arr

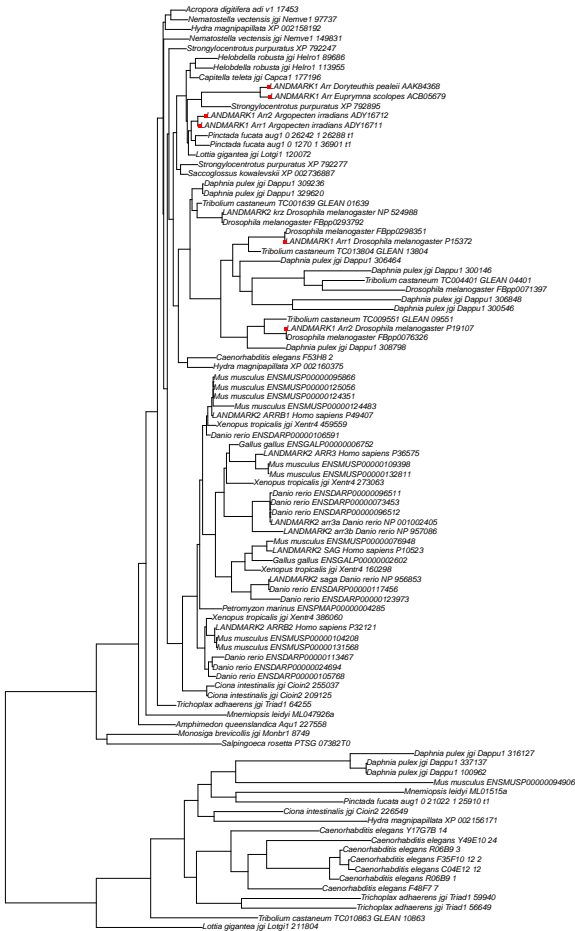

# Tree File: rdgC

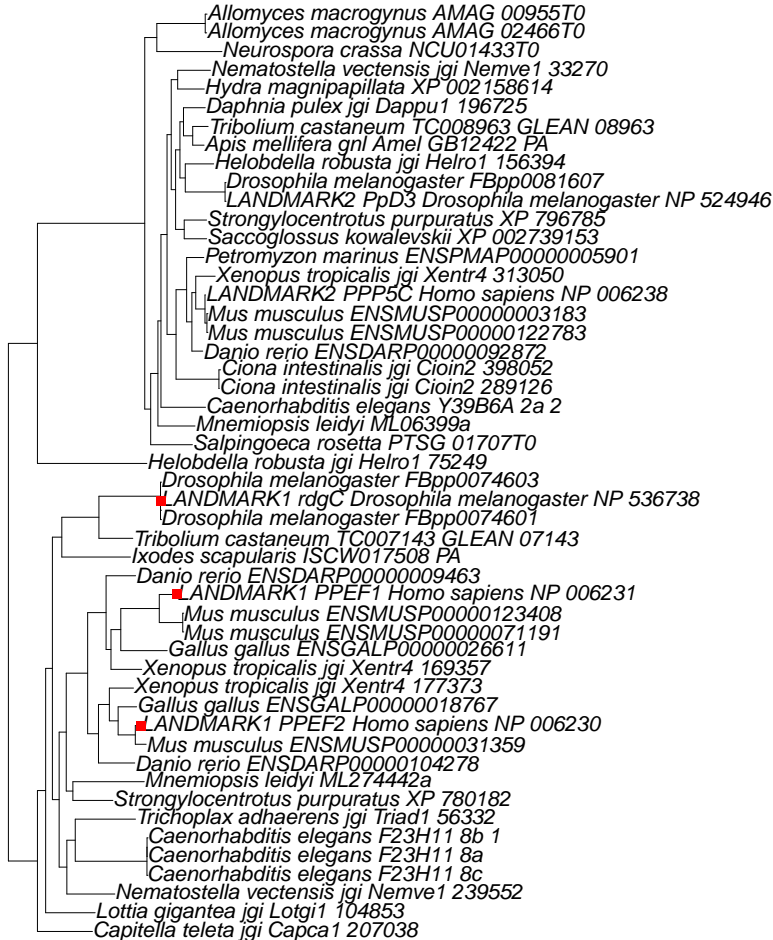

# Tree File: PKC

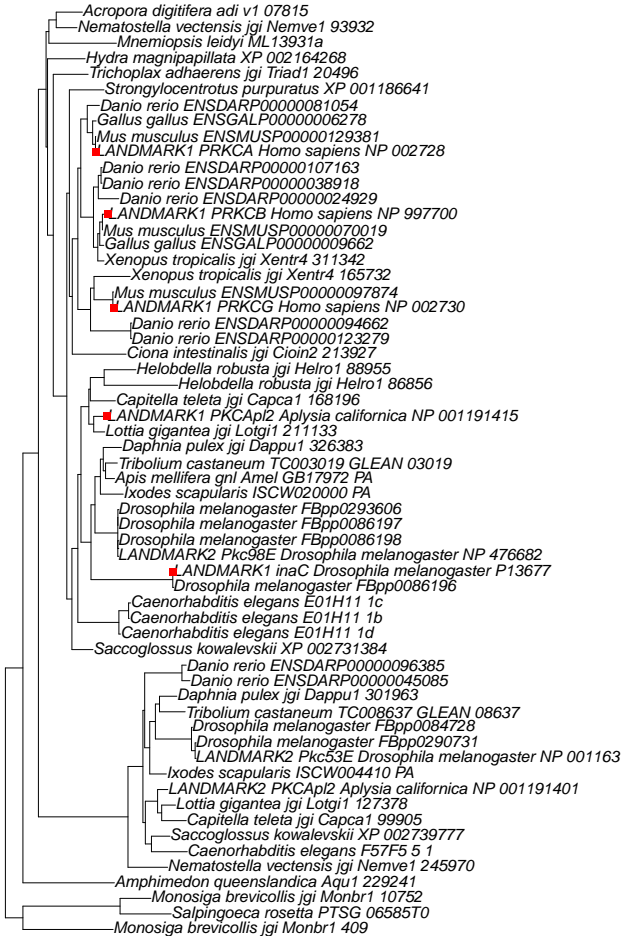

# Tree File: Rcvrn

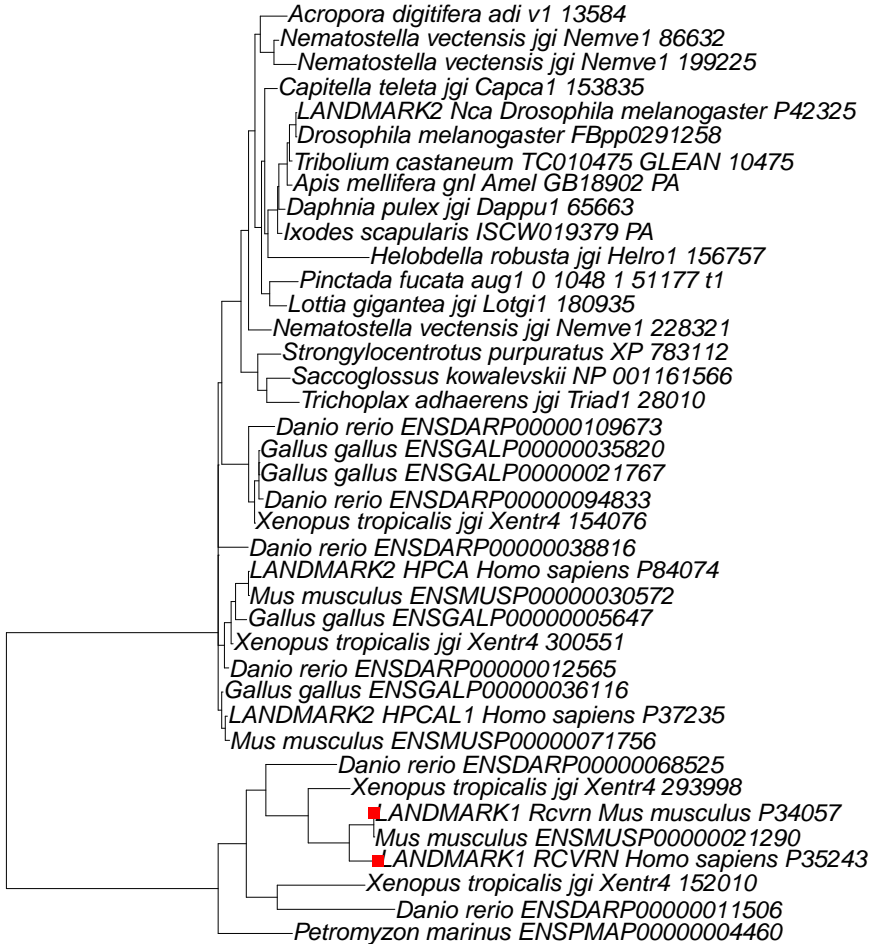



# Tree File: RGS9

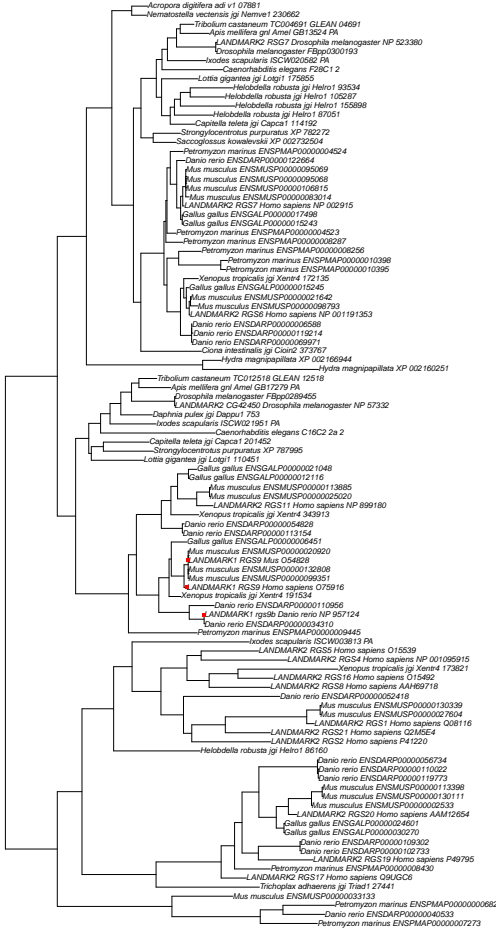

# Tree File: Grk1

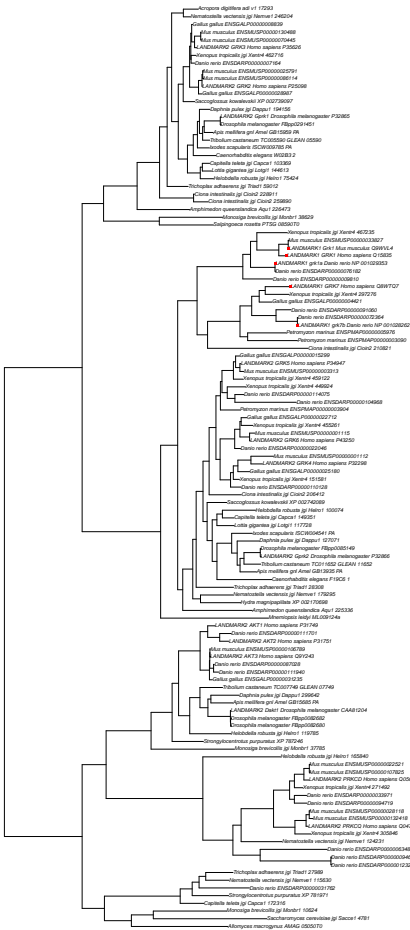

# Tree File: Gngt1

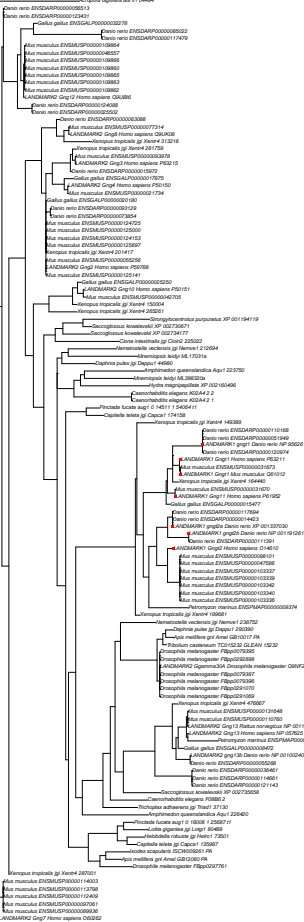

# Tree File: Sag

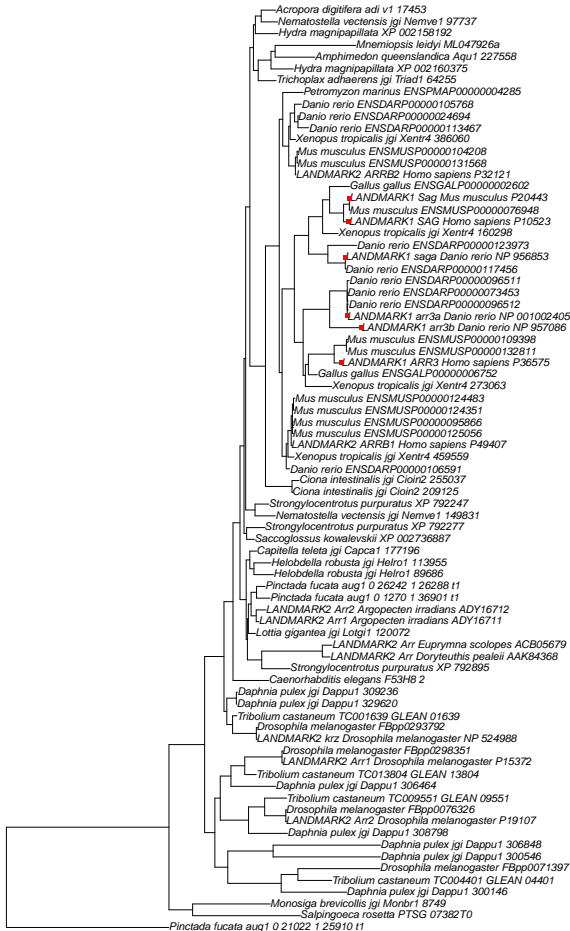

# Tree File: Rgs9bp

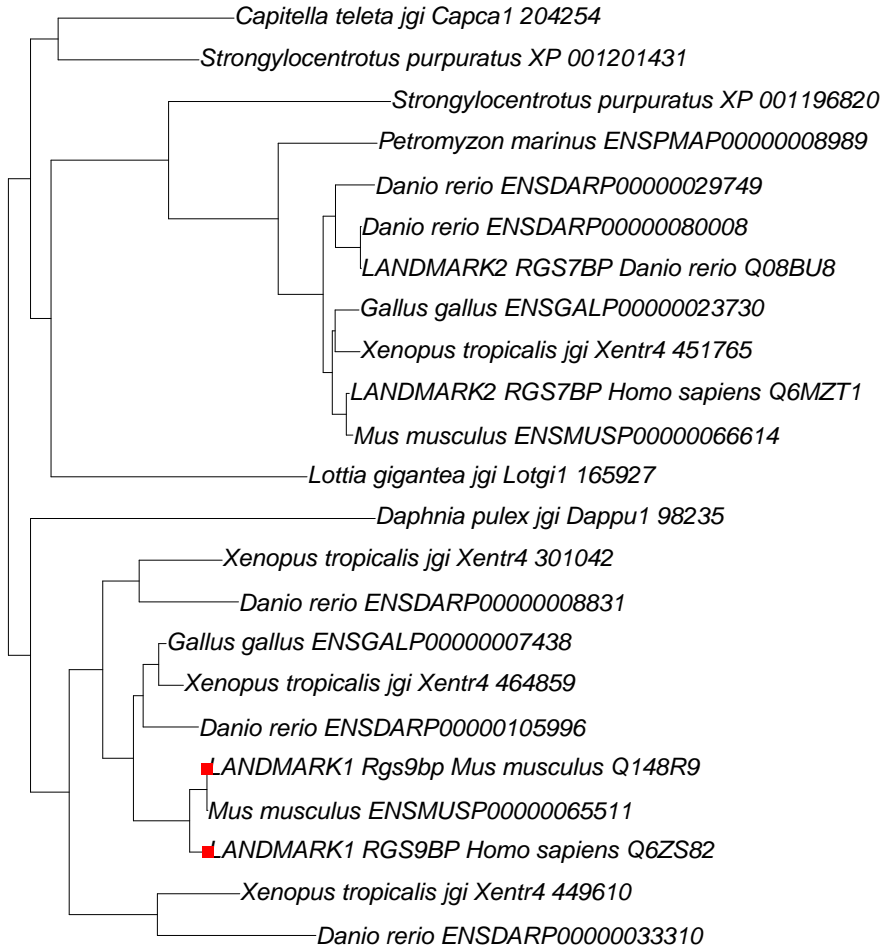

# Tree File: GC

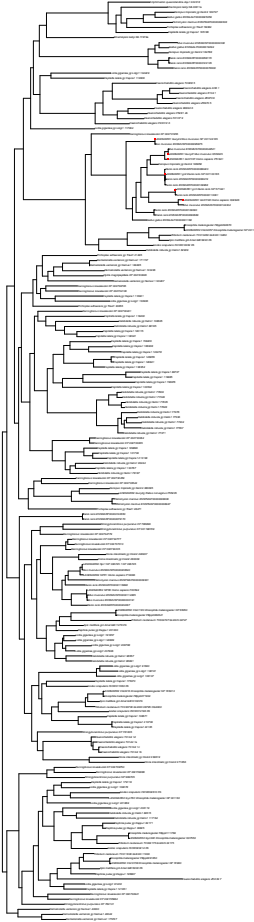

# Tree File: Pde6d

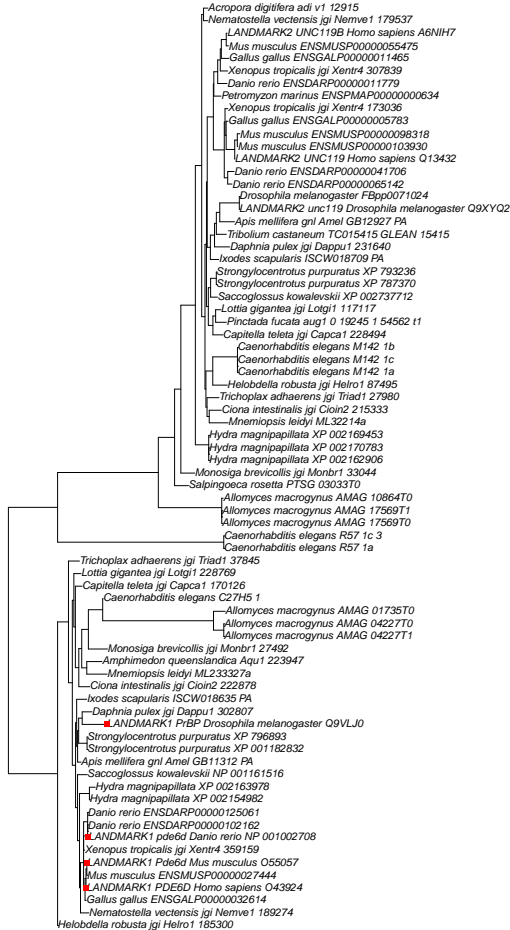

# Tree File: Galpha\_it

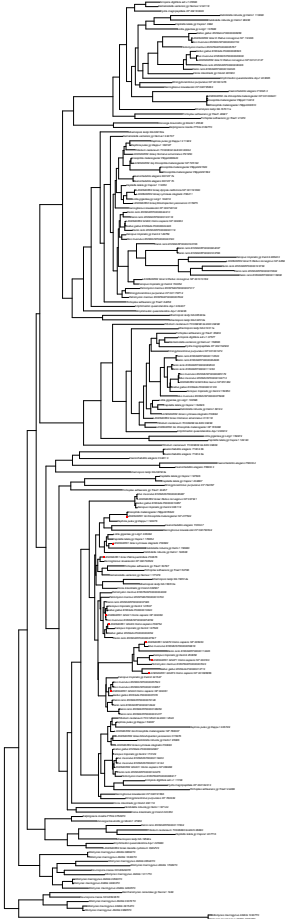



# Tree File: c\_opsin

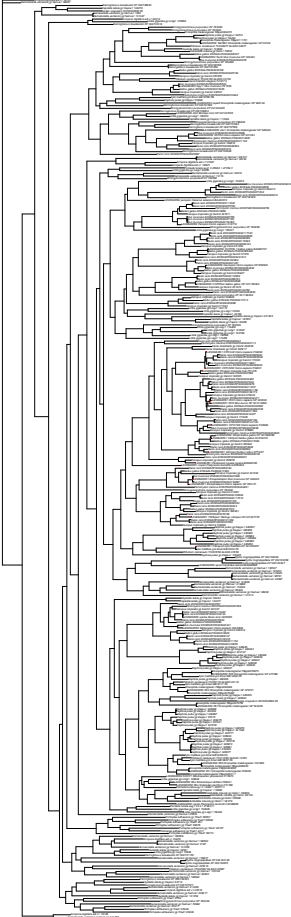

# Tree File: Pde6abc

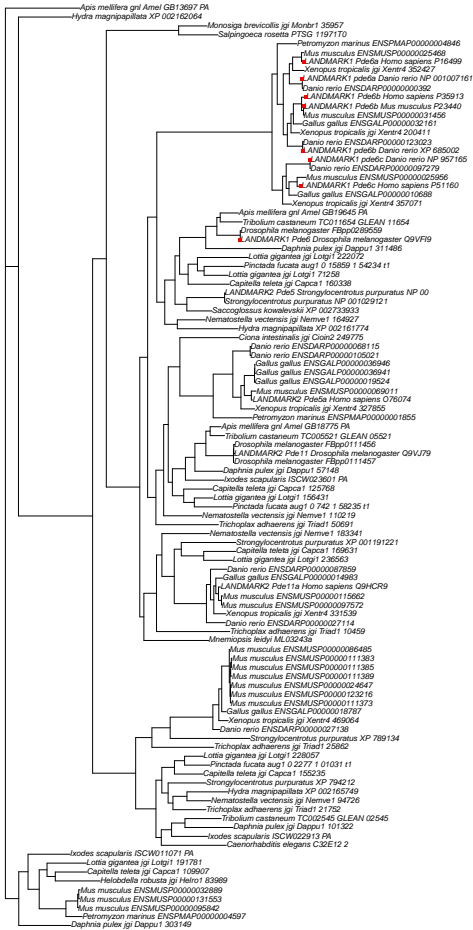



# Tree File: RPE65

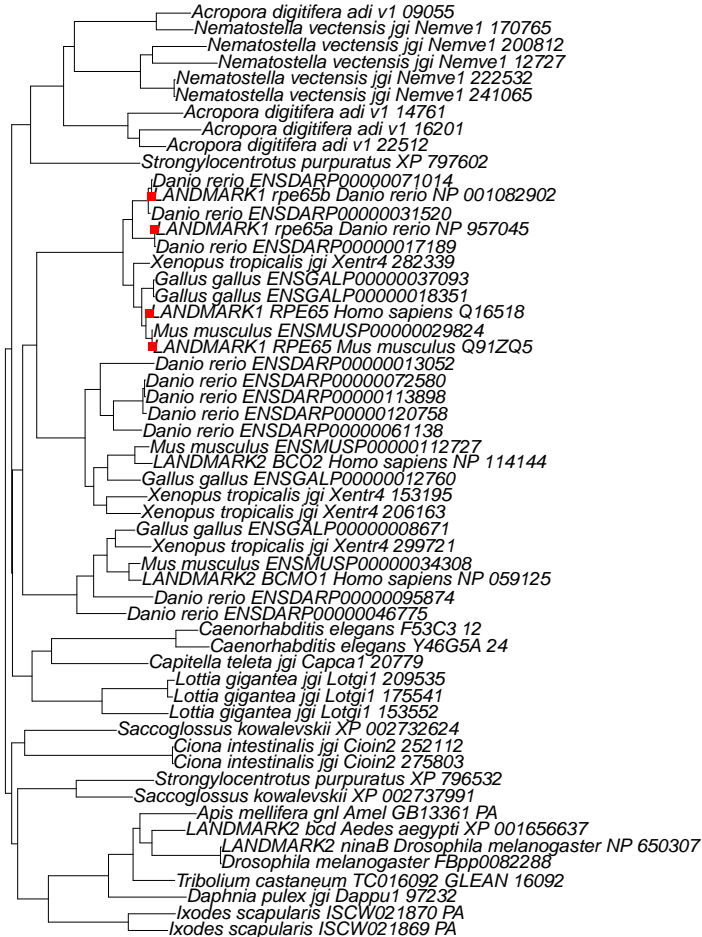

# Tree File: RLBP1

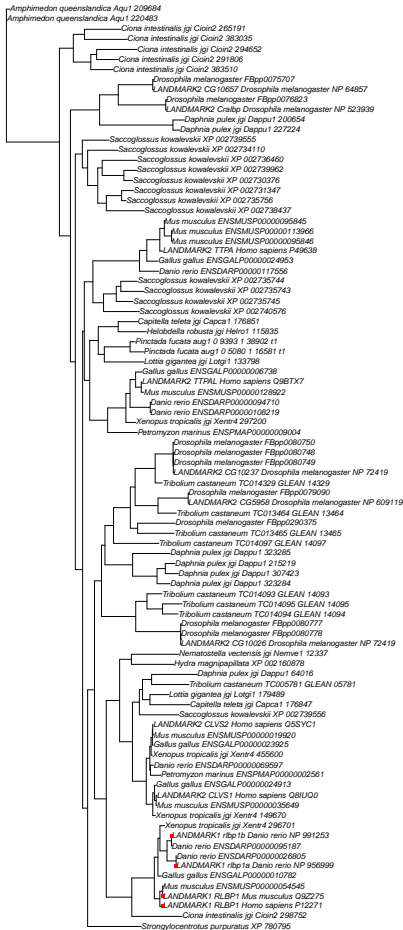

# Tree File: RDH5

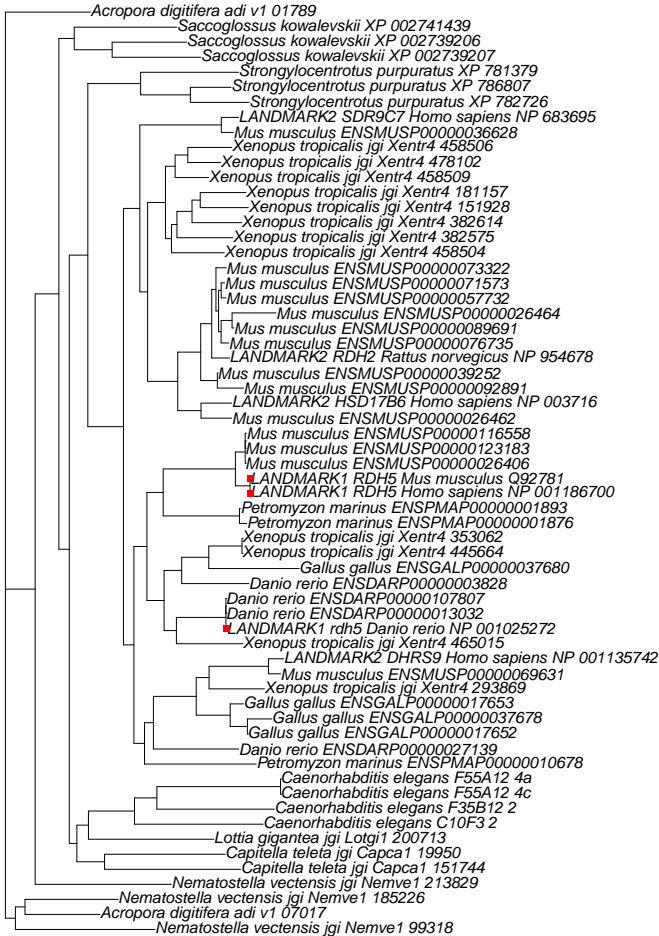

# Tree File: LRAT

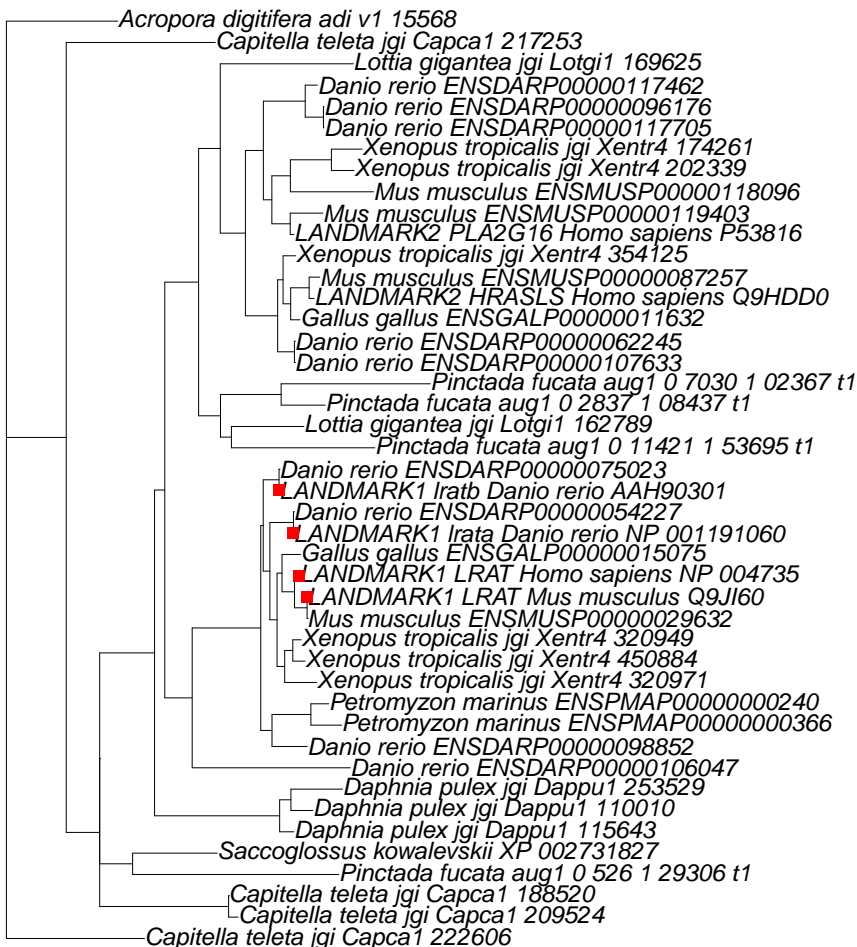

# Tree File: RBP3

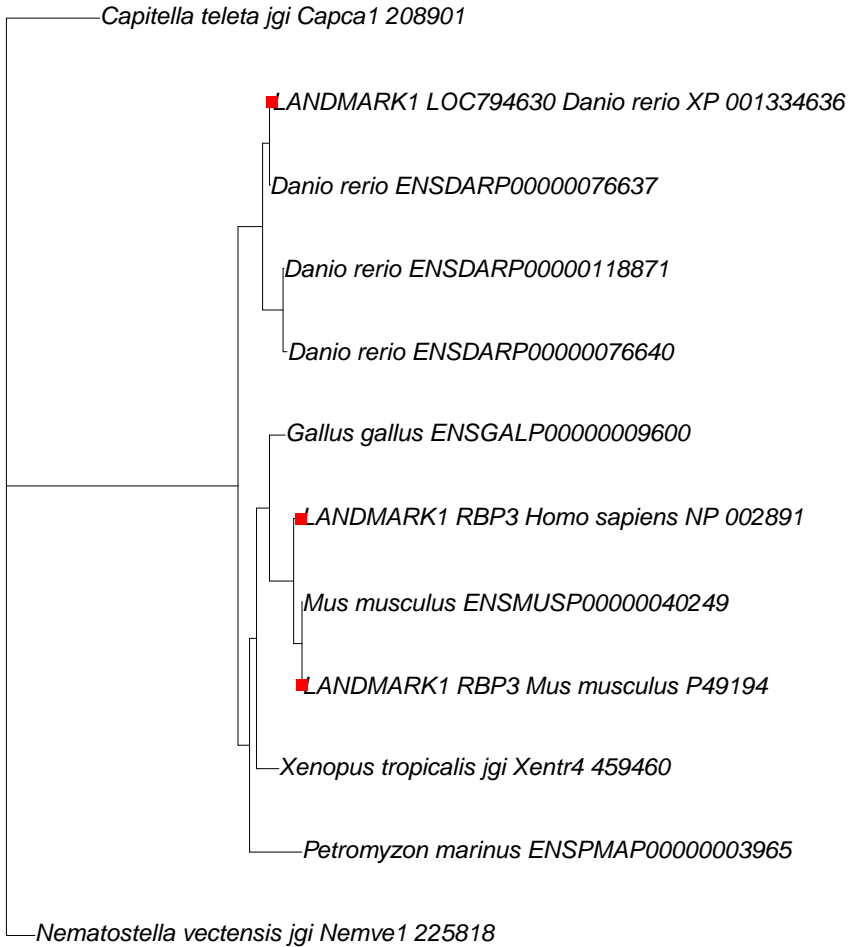



# Tree File: RBP1

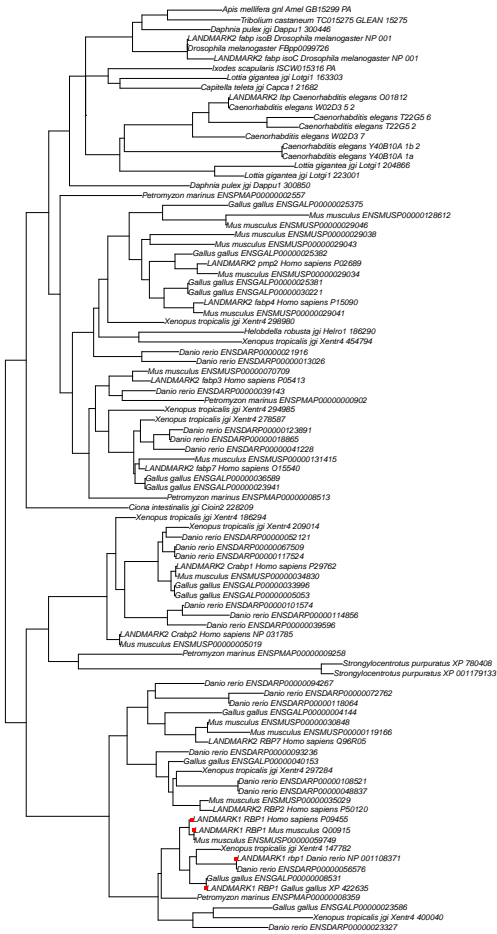

# Tree File: RDH8

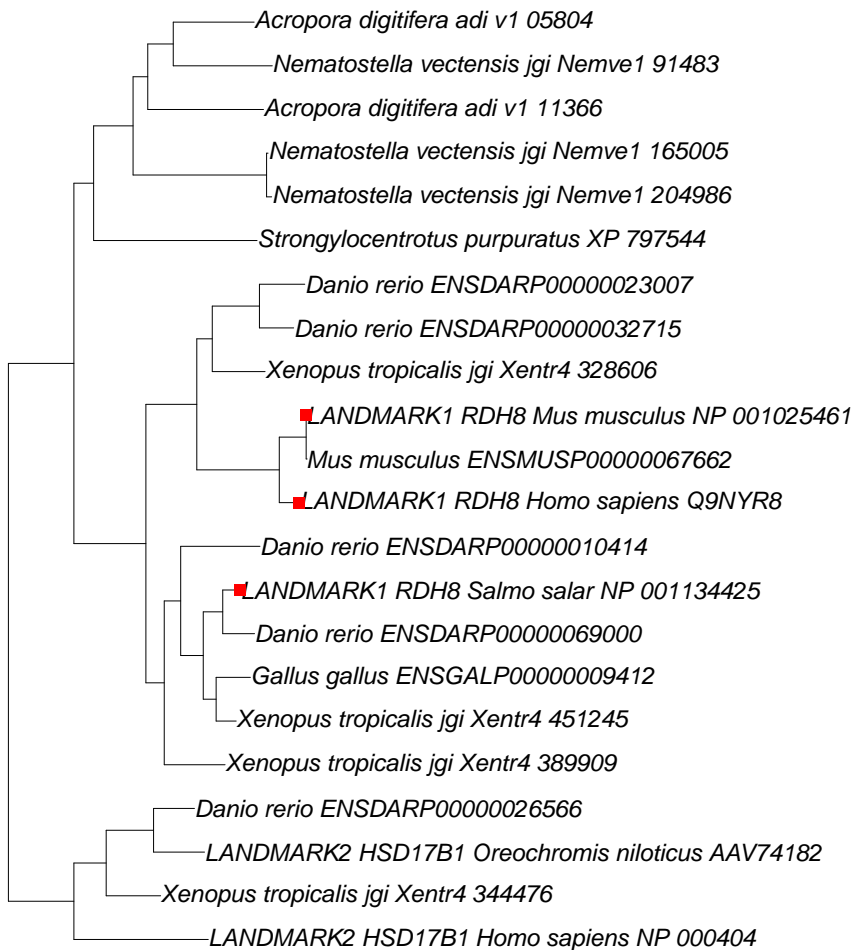

# Tree File: ABCA4

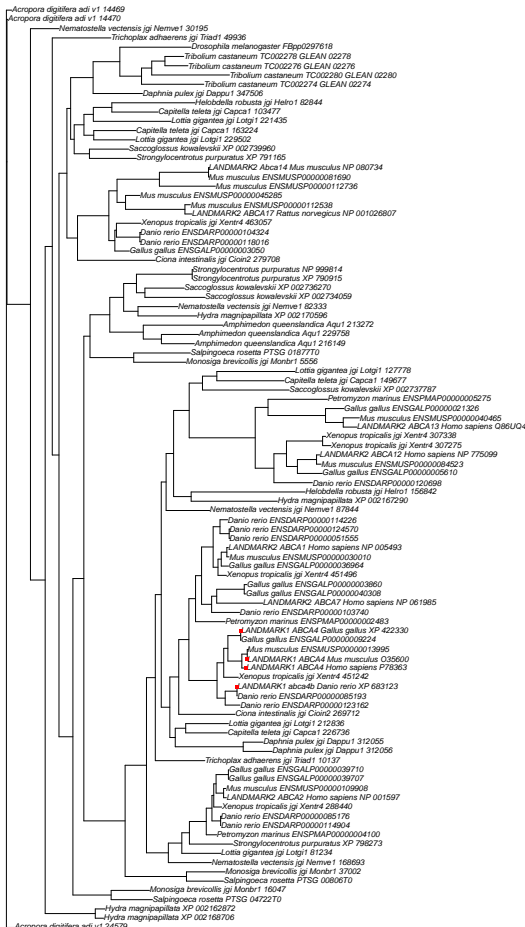

# Tree File: RALBP

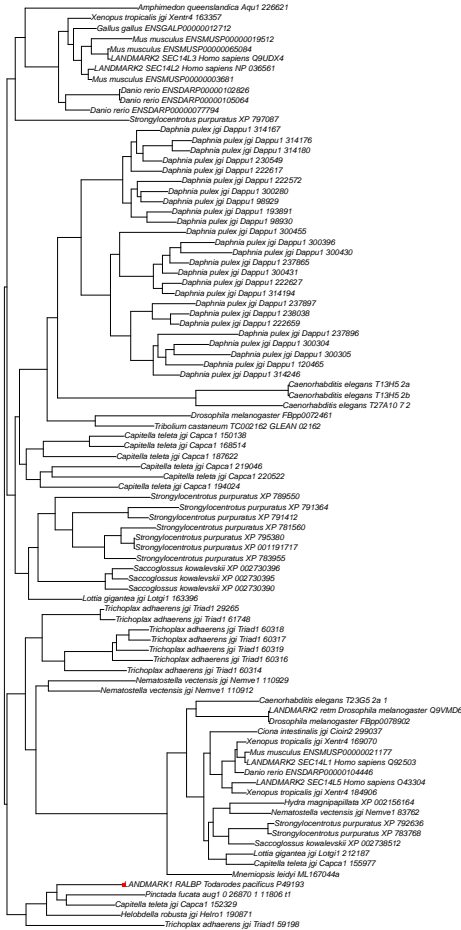

# Tree File: pinta

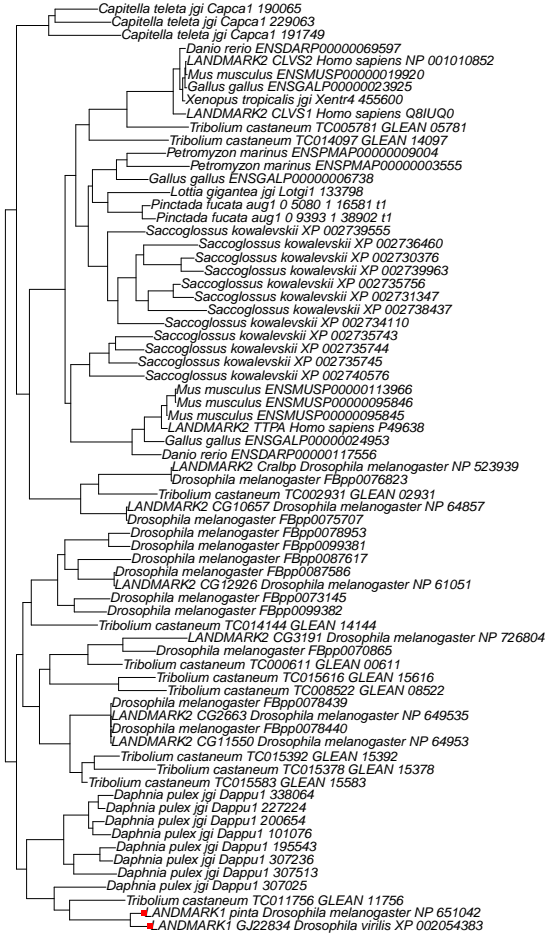





# Tree File: ninaB

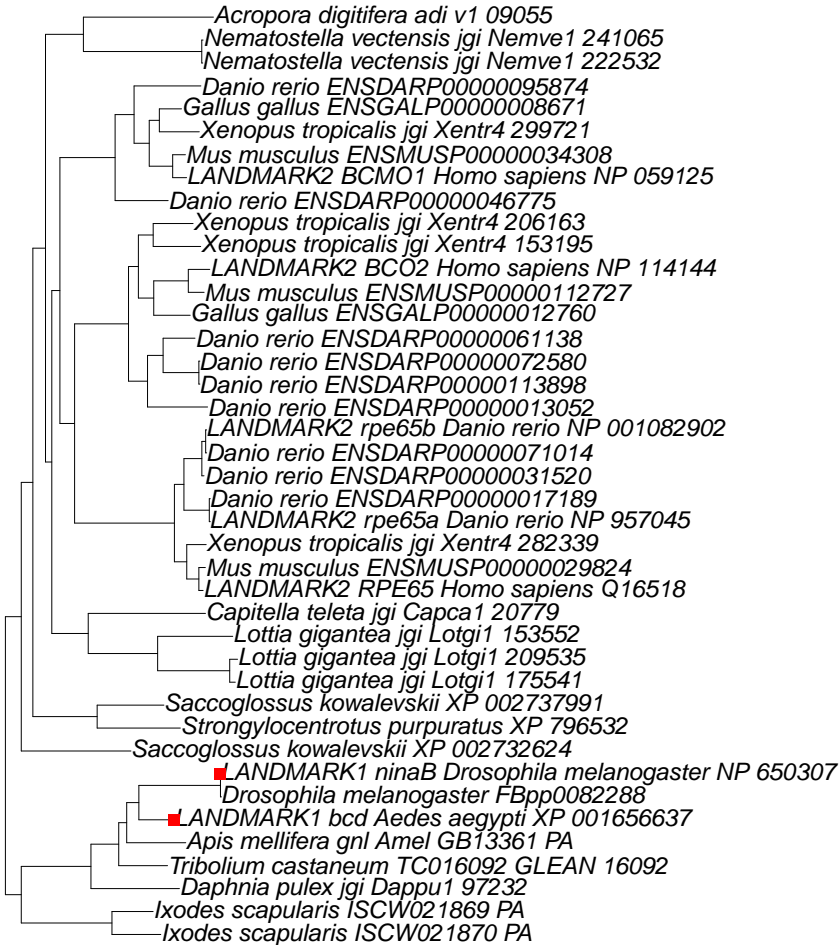



# Tree File: santamaria

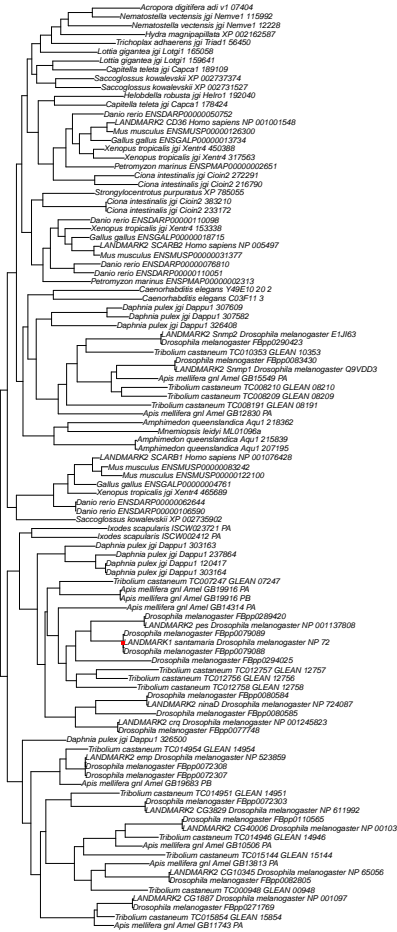

# Tree File: DCE

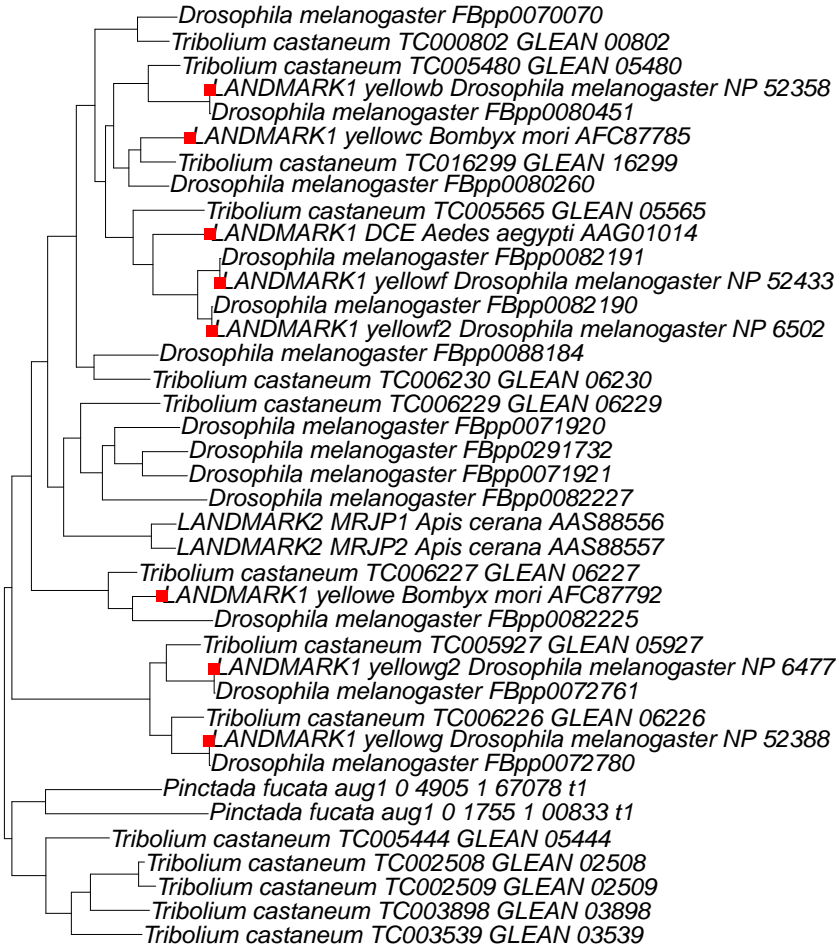

# Tree File: laccase2

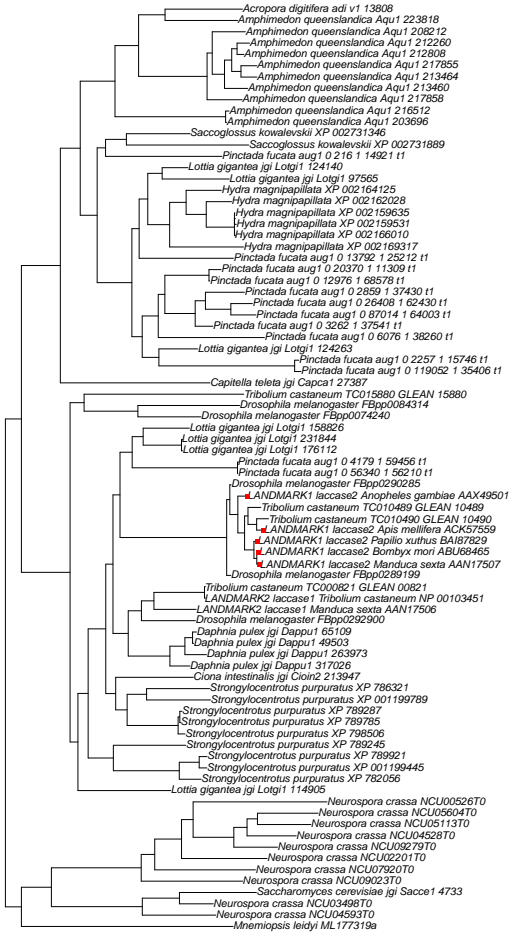

# Tree File: TYR

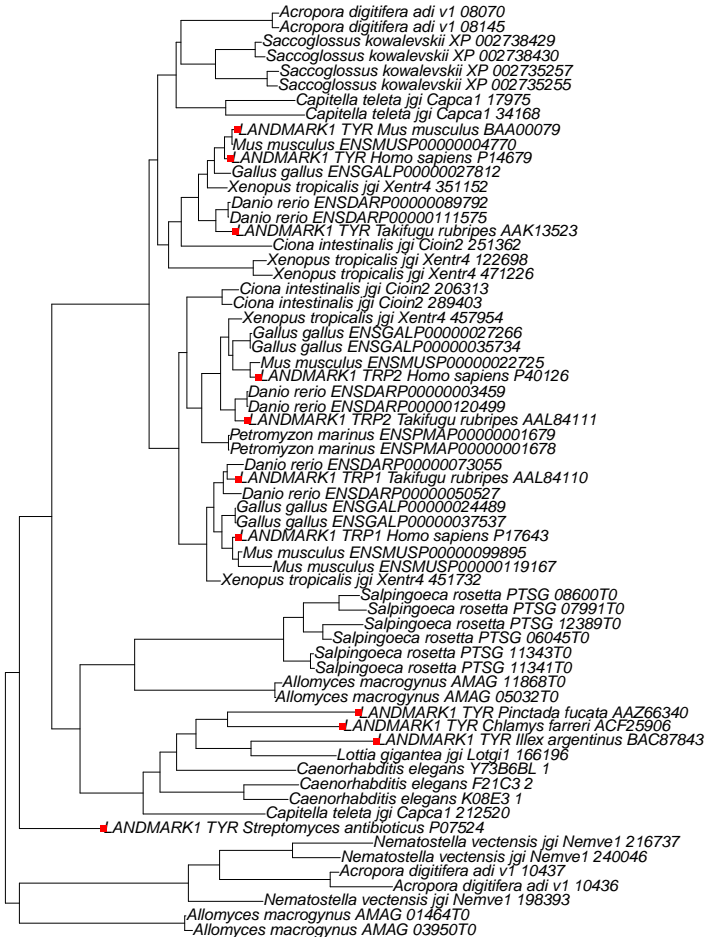

# Tree File: DDC

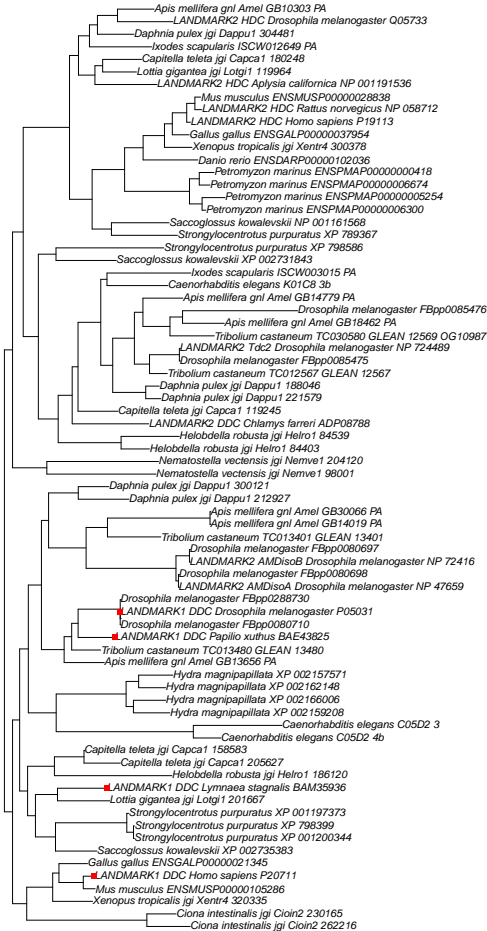

# Tree File: TH

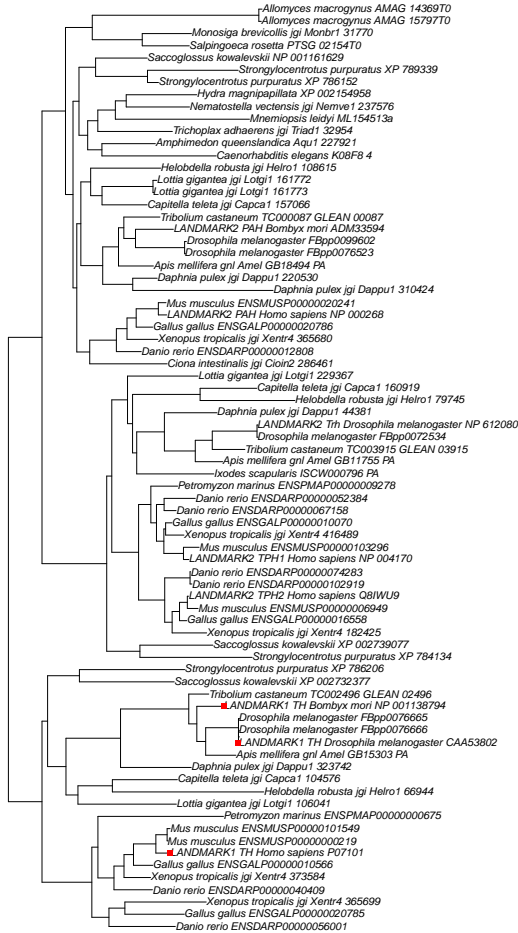

# Tree File: NBAD

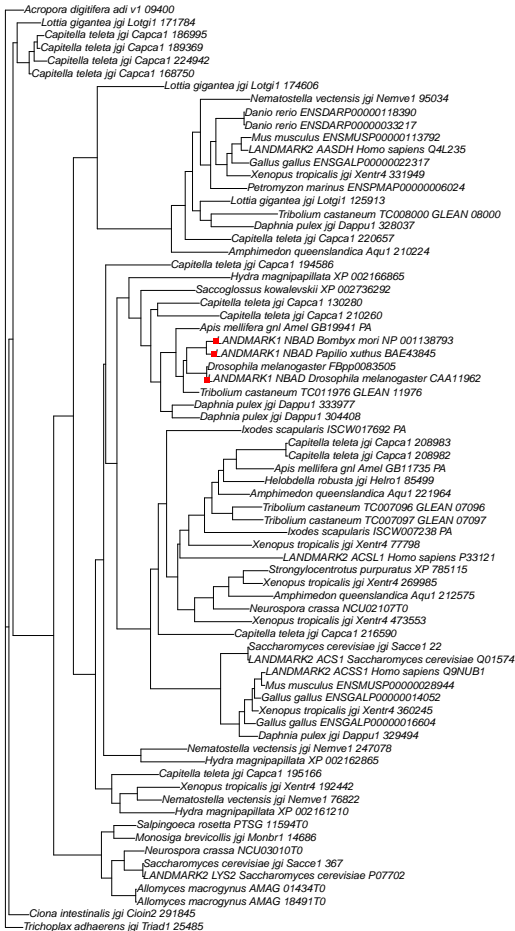

# Tree File: CSAD

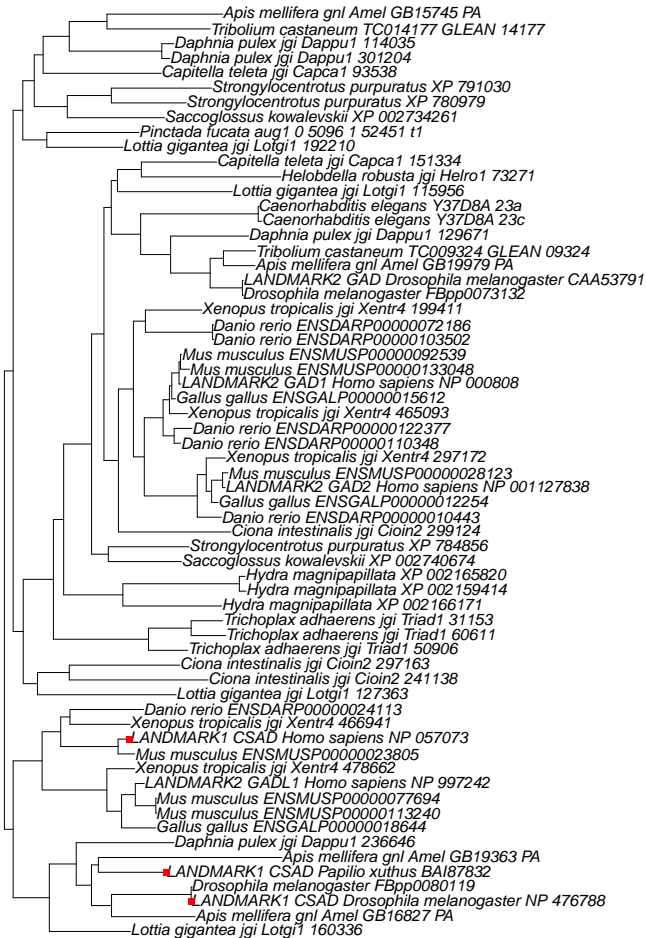



# Tree File: PPO

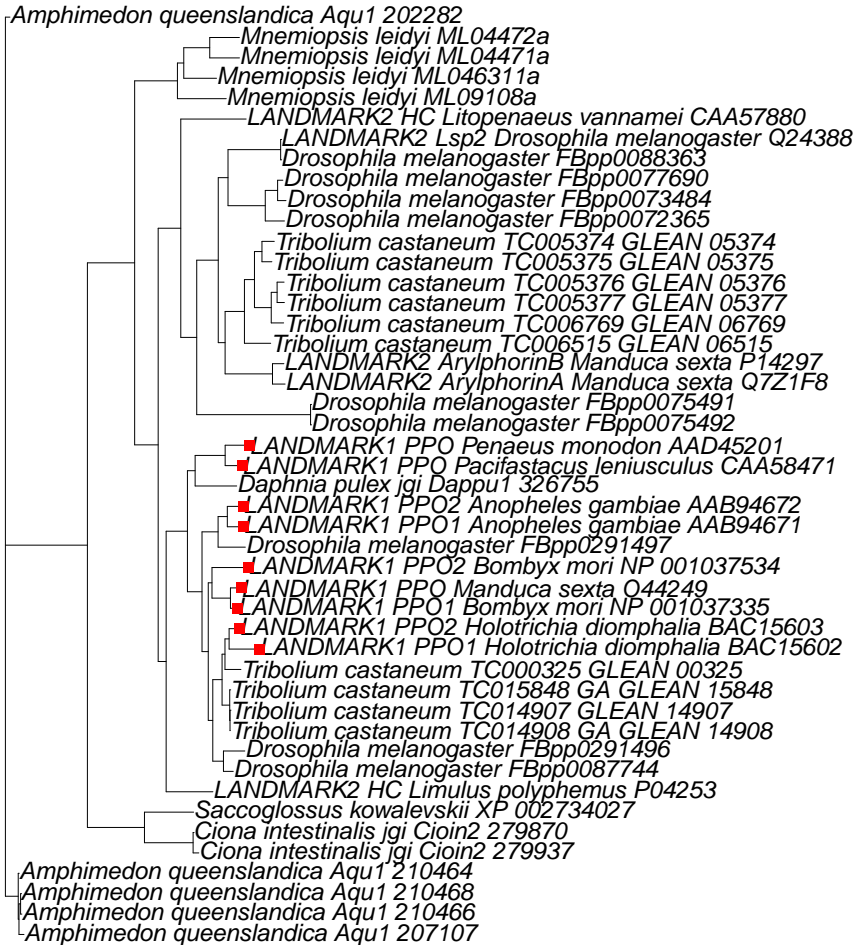

# Tree File: tan

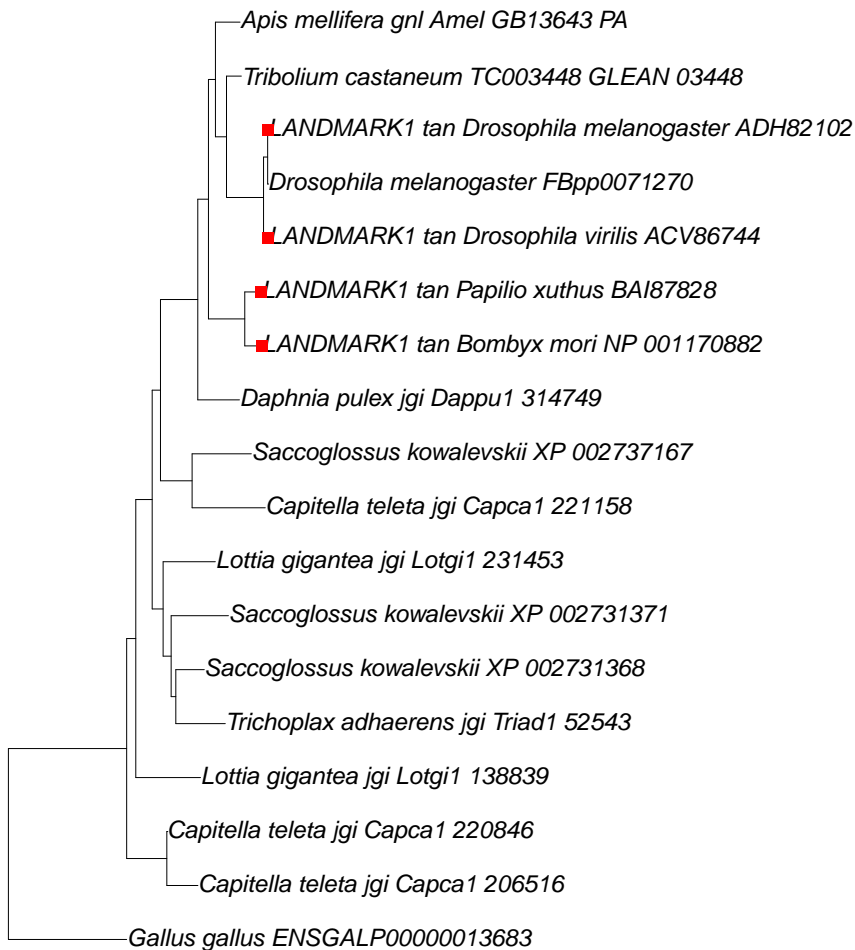

# Tree File: Dat

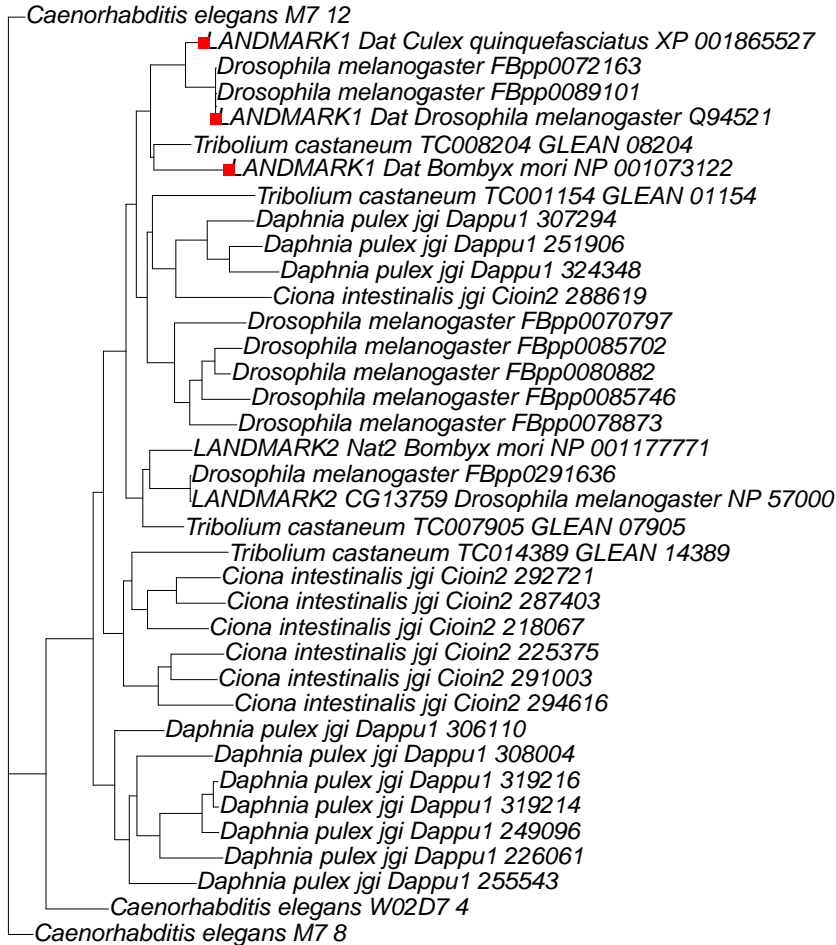

# Tree File: GCH1

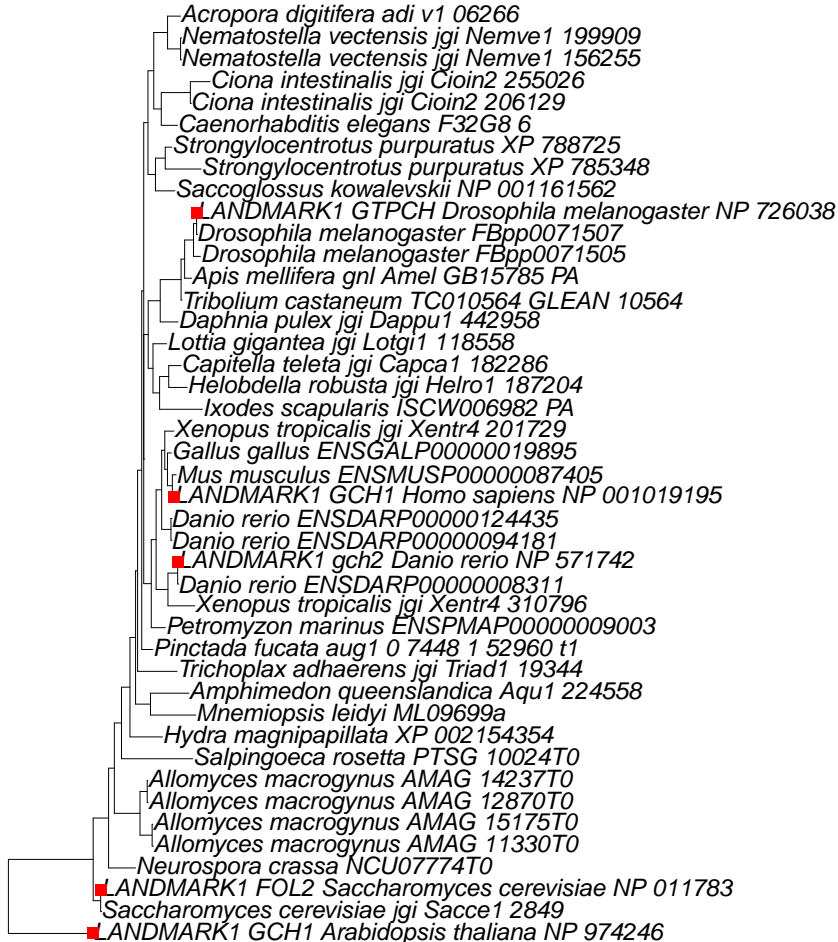

# Tree File: XDH

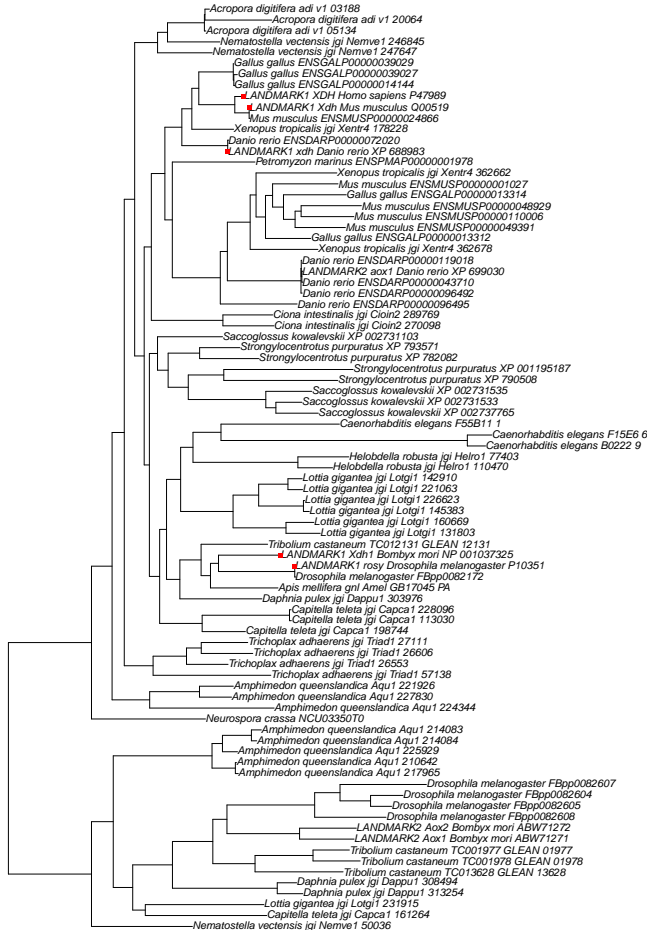

# Tree File: Pcd

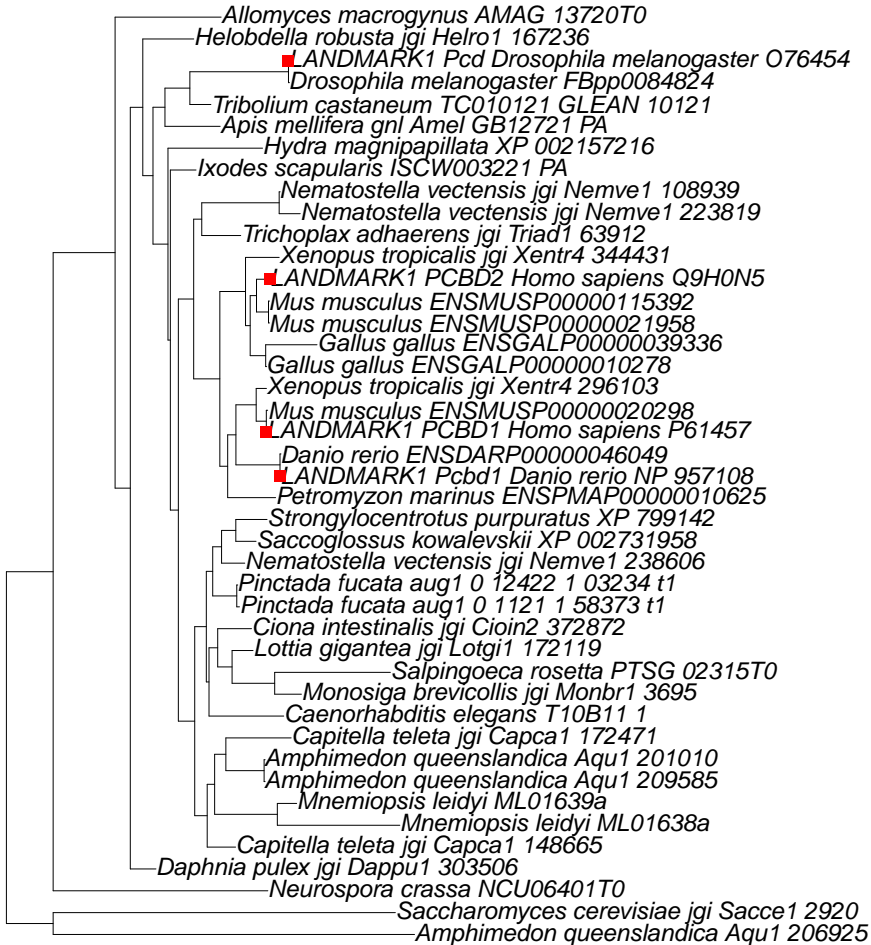

# Tree File: PTS

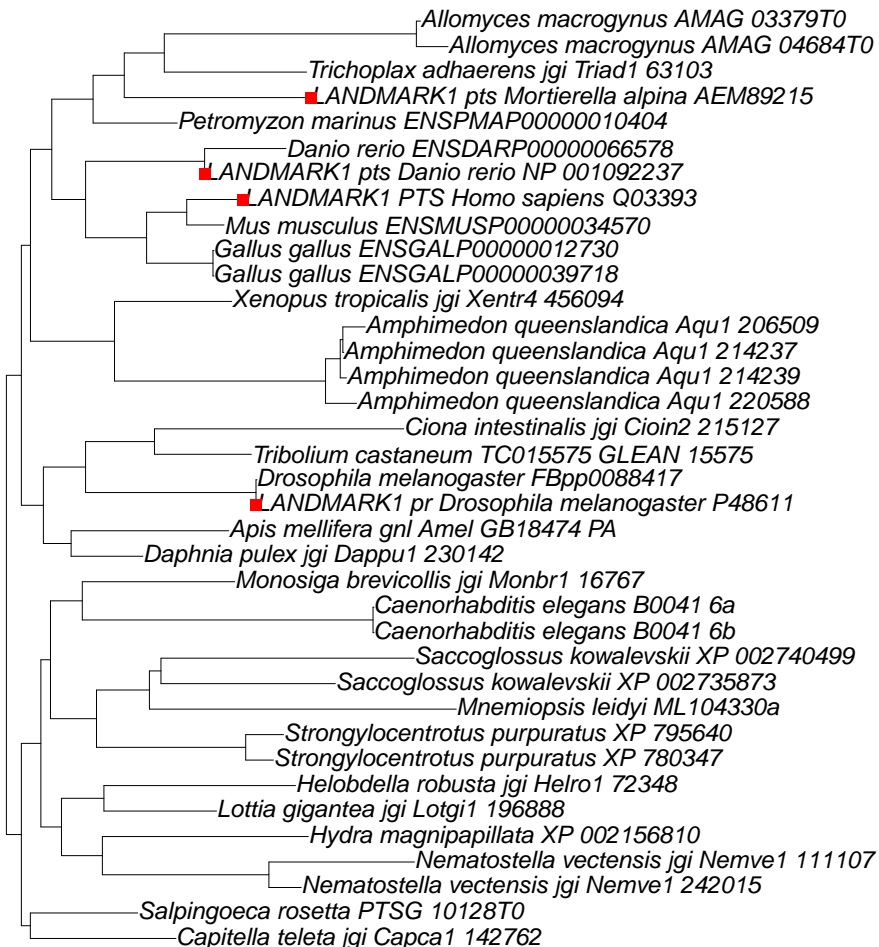

# Tree File: clot

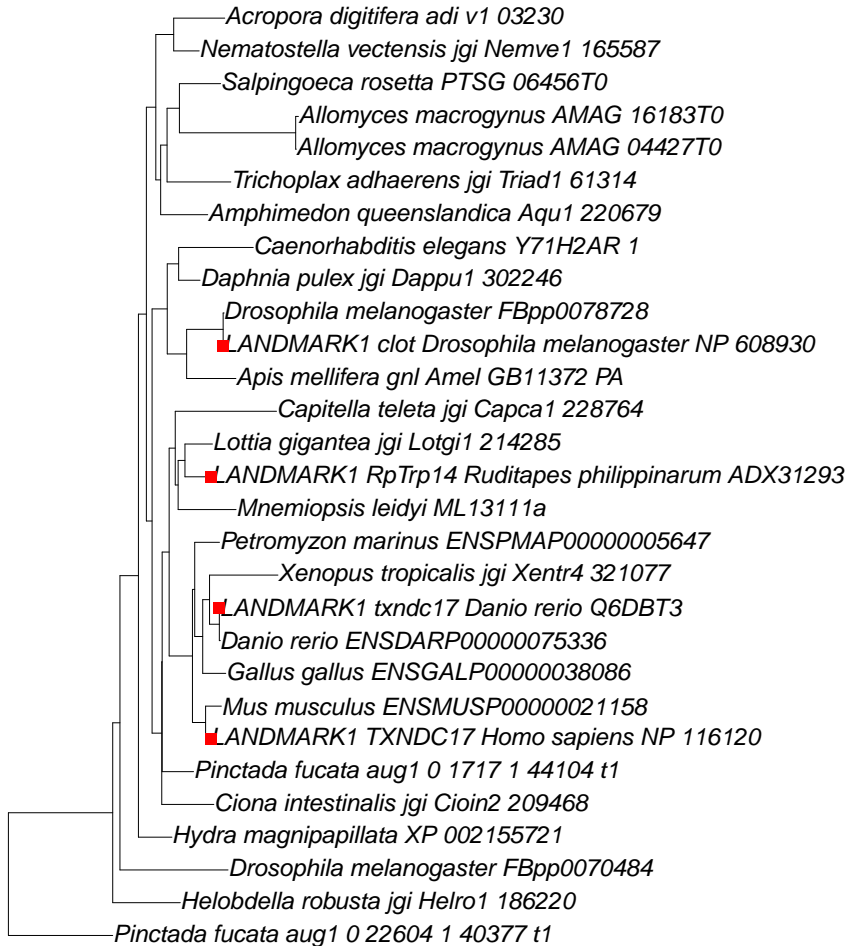



# Tree File: sepia

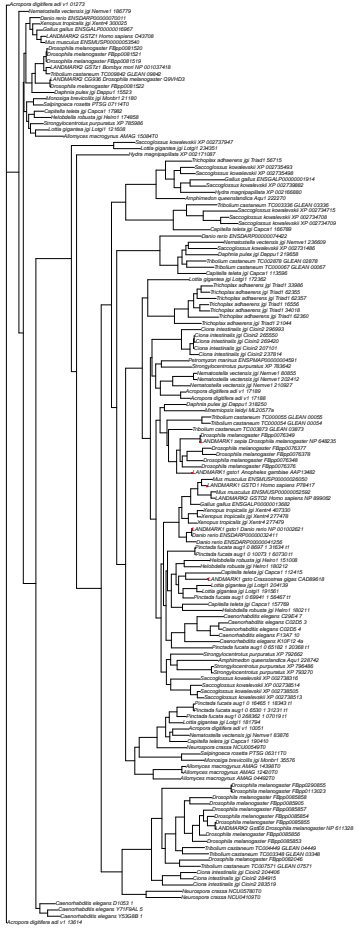

# Tree File: Dhpr

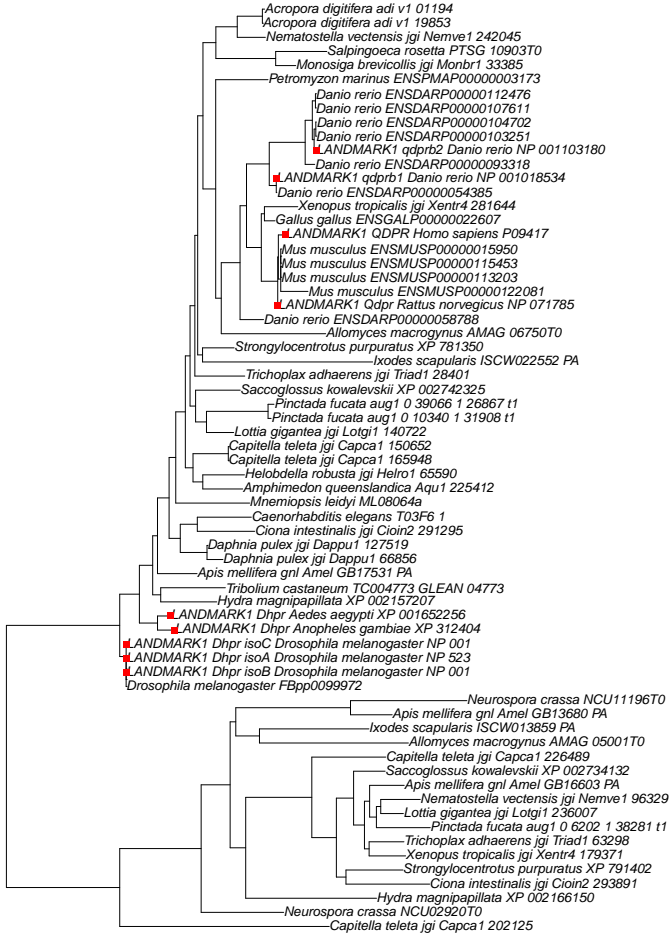

# Tree File: SPR

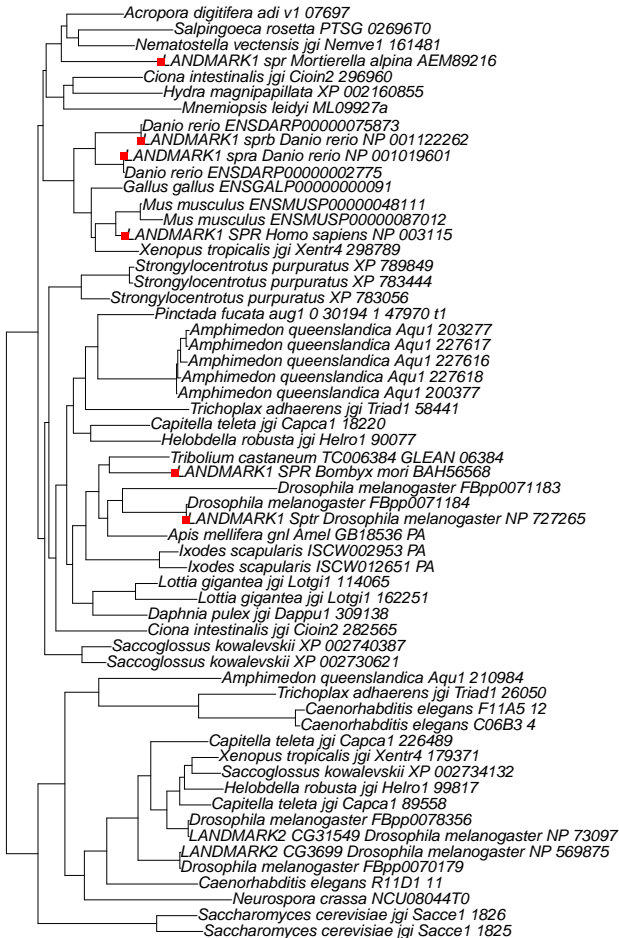

# Tree File: oca2

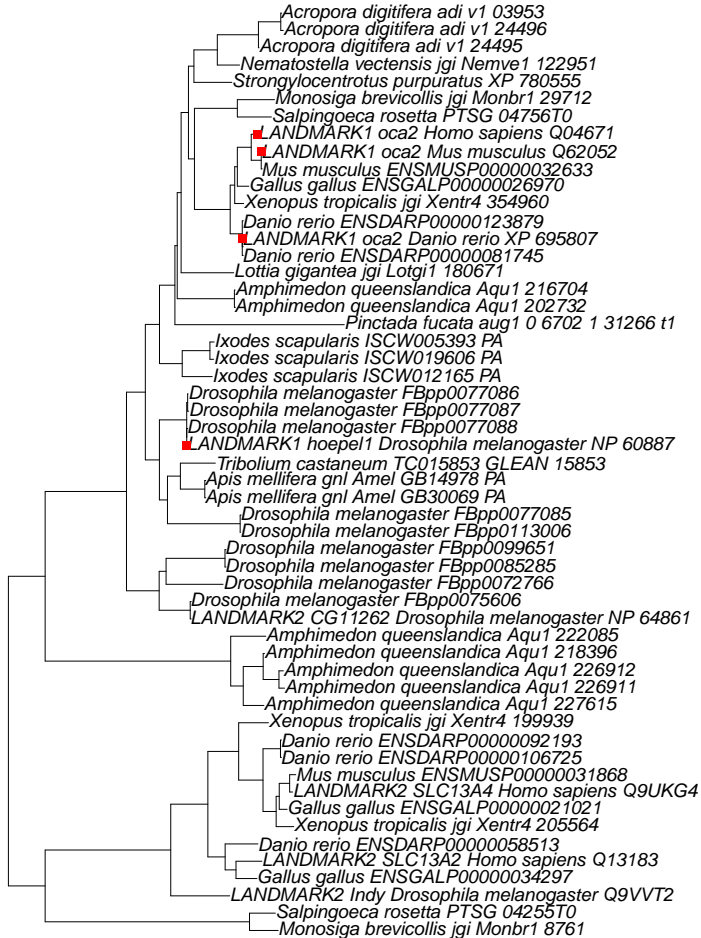

# Tree File: TDO

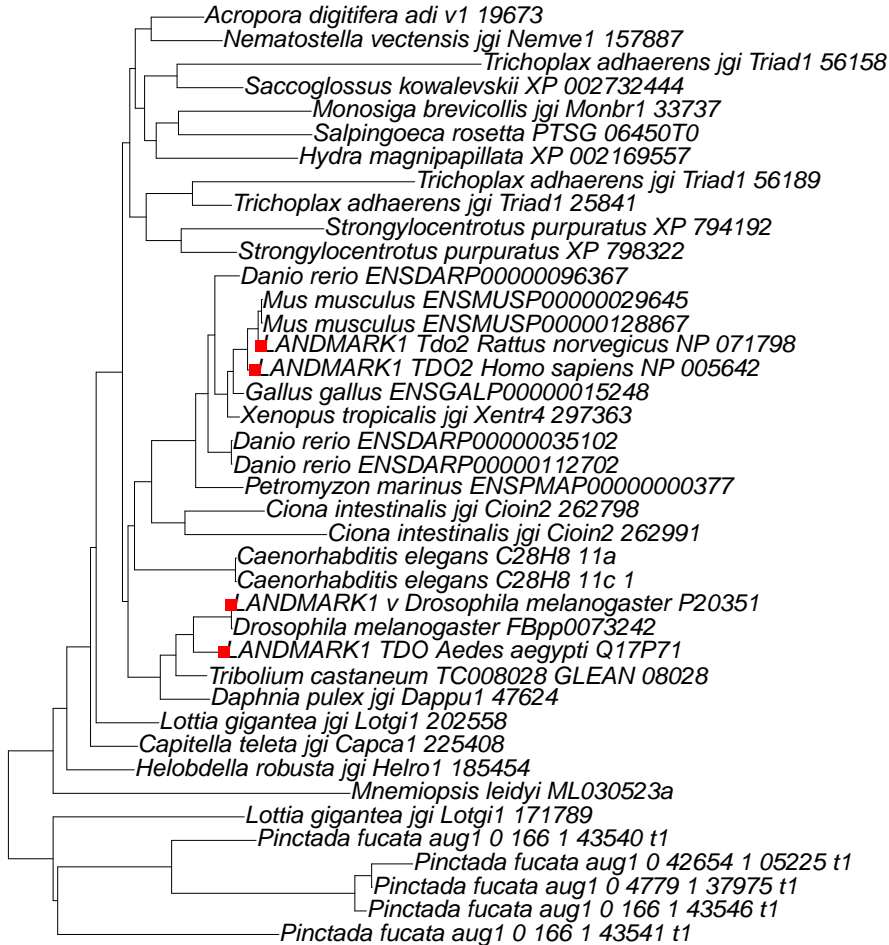



# Tree File: KF

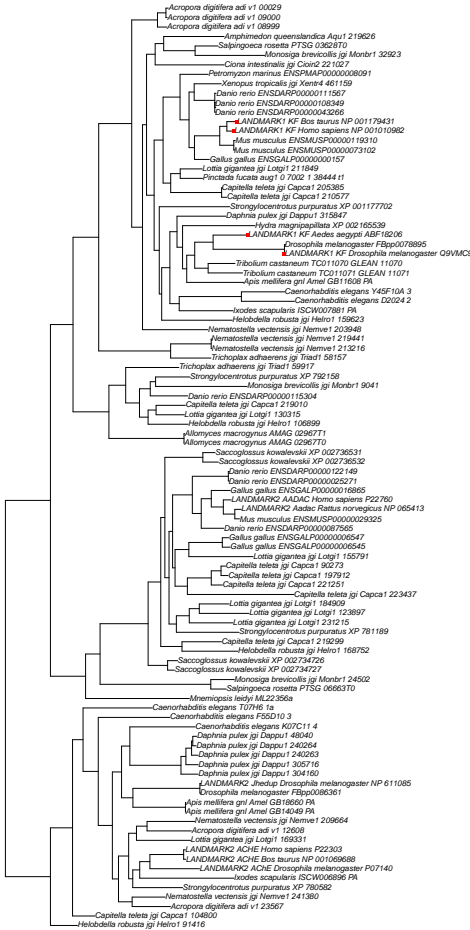

# Tree File: KMO

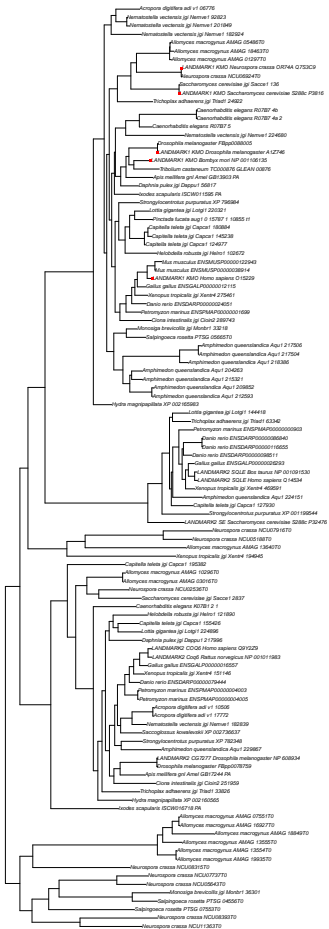



# Tree File: white

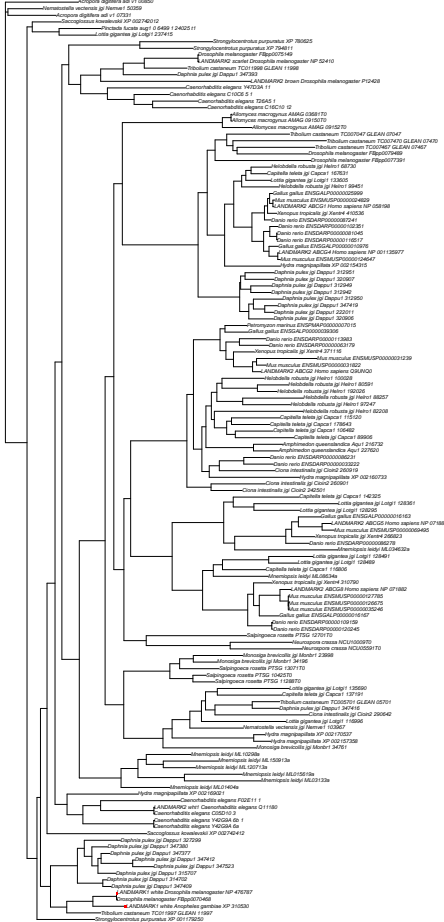

# Tree File: Mitf

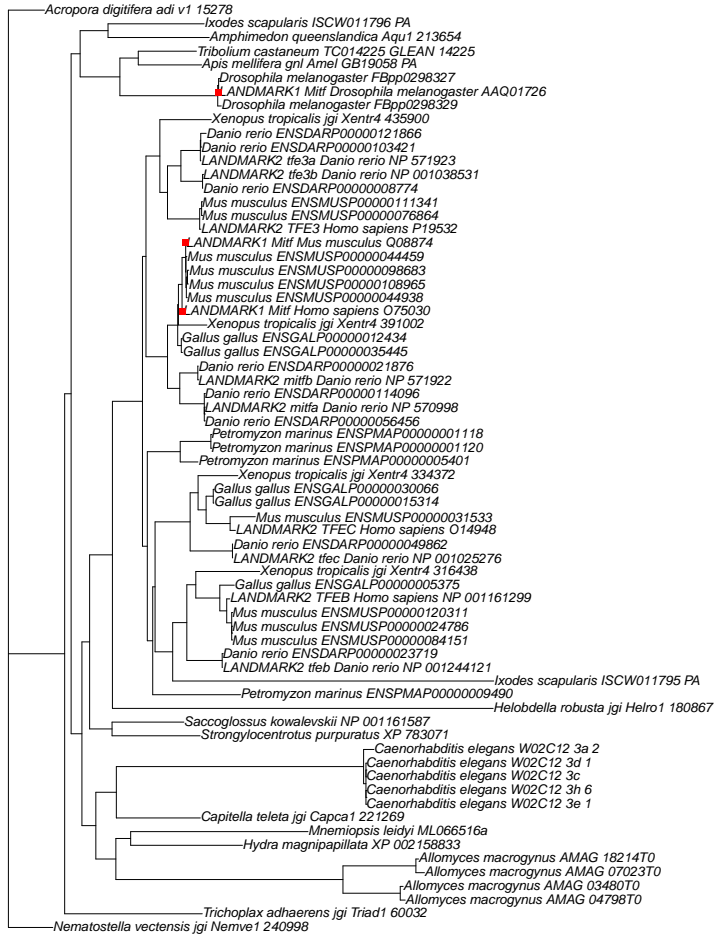

# Tree File: Uros

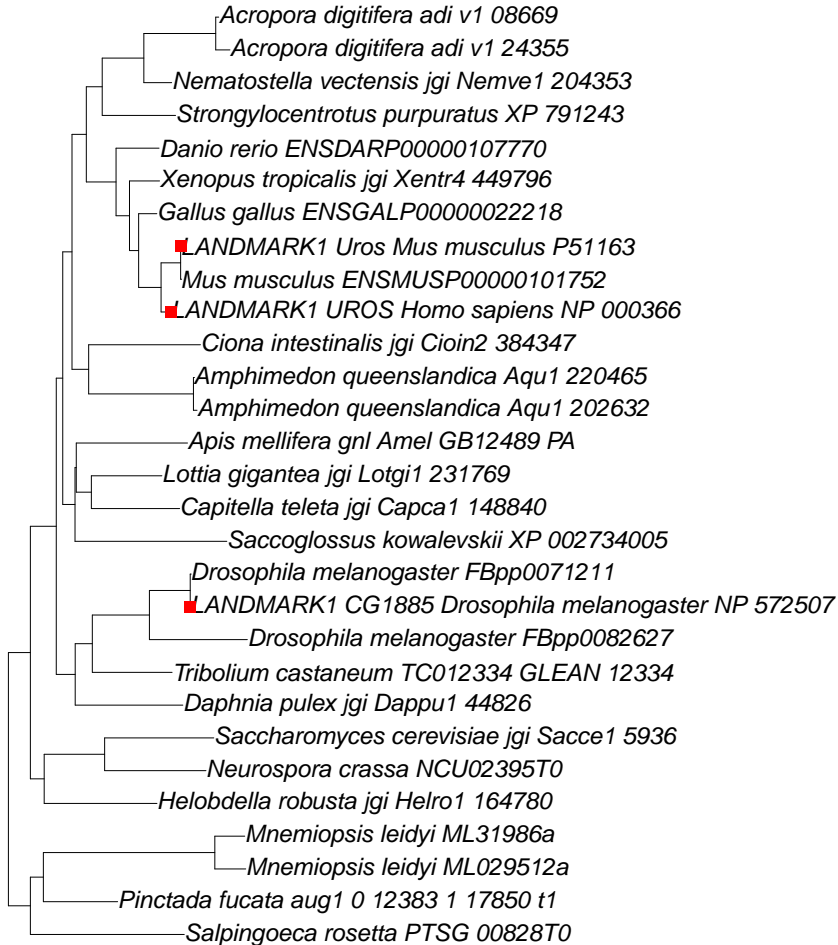

# Tree File: Ppox

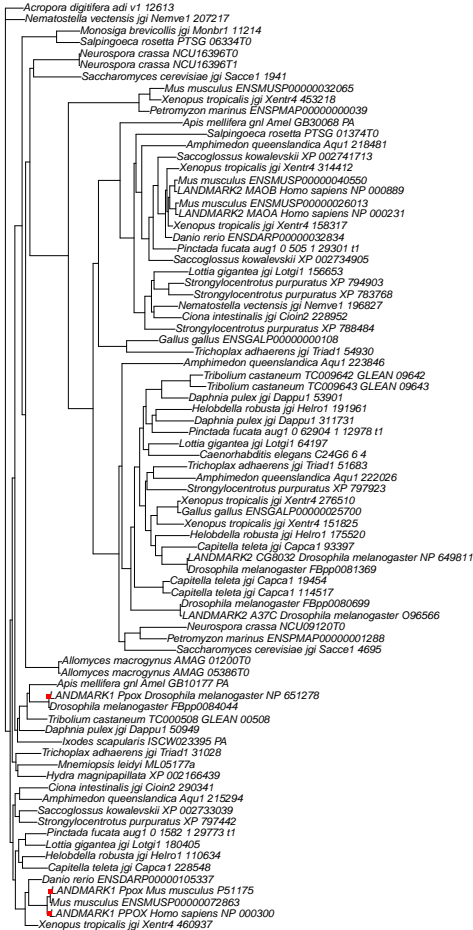

# Tree File: Alas

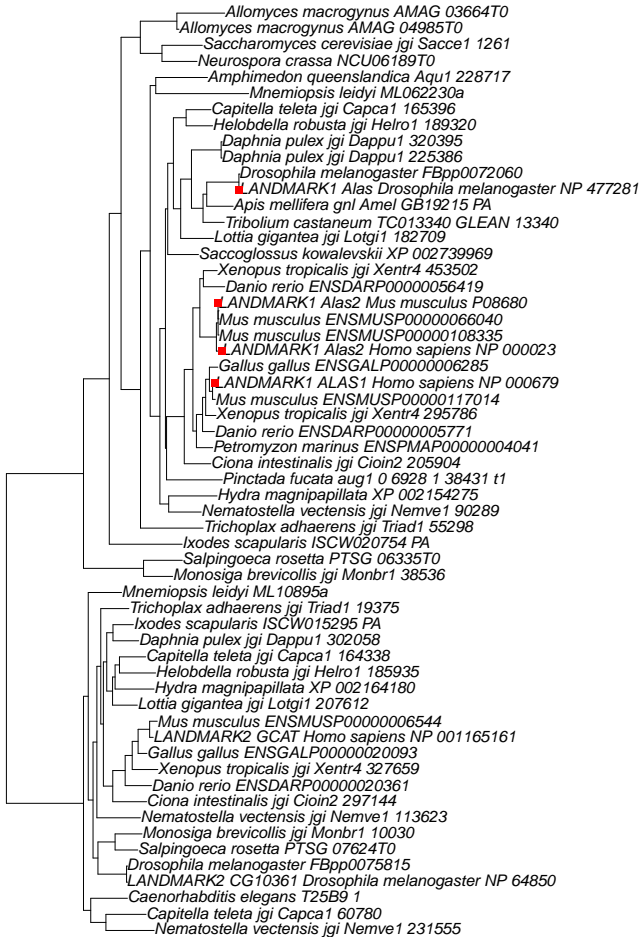

# Tree File: Cpox

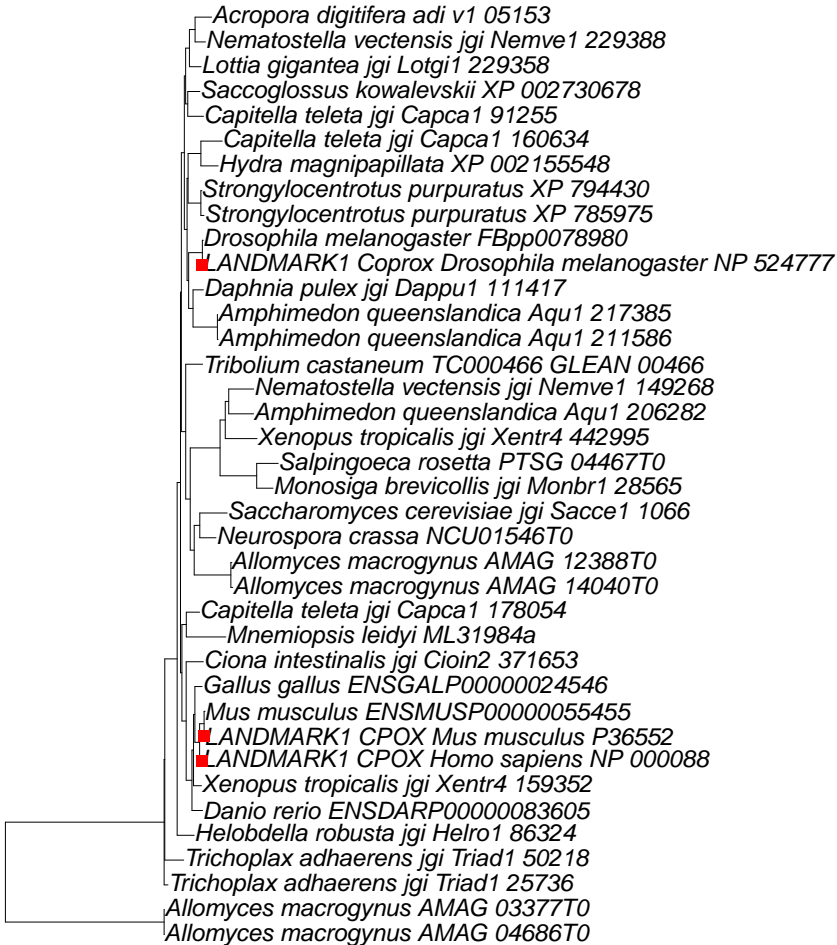

# Tree File: Fech

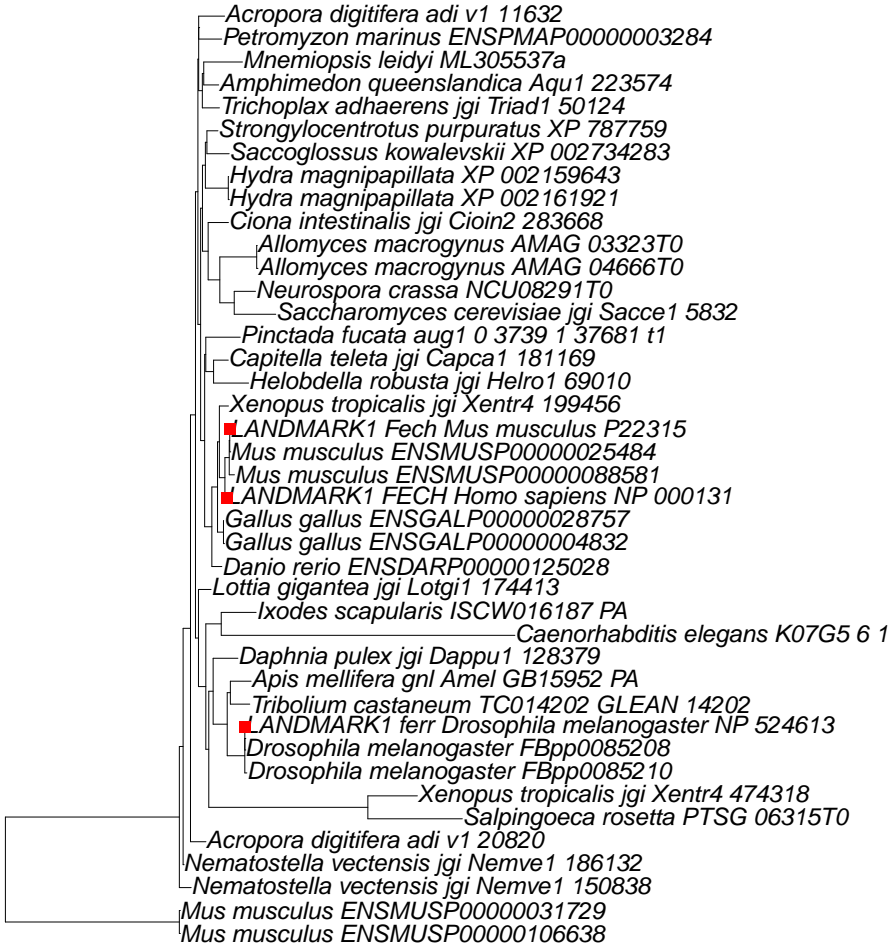

# Tree File: Alad

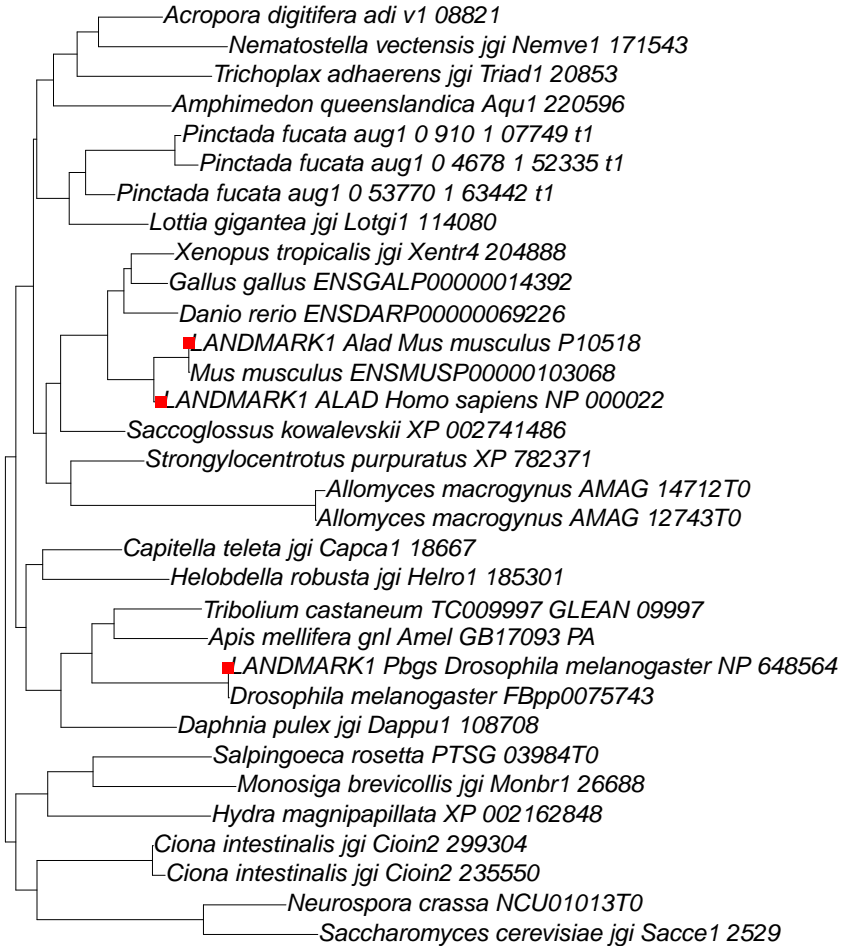



# Tree File: Pbgd

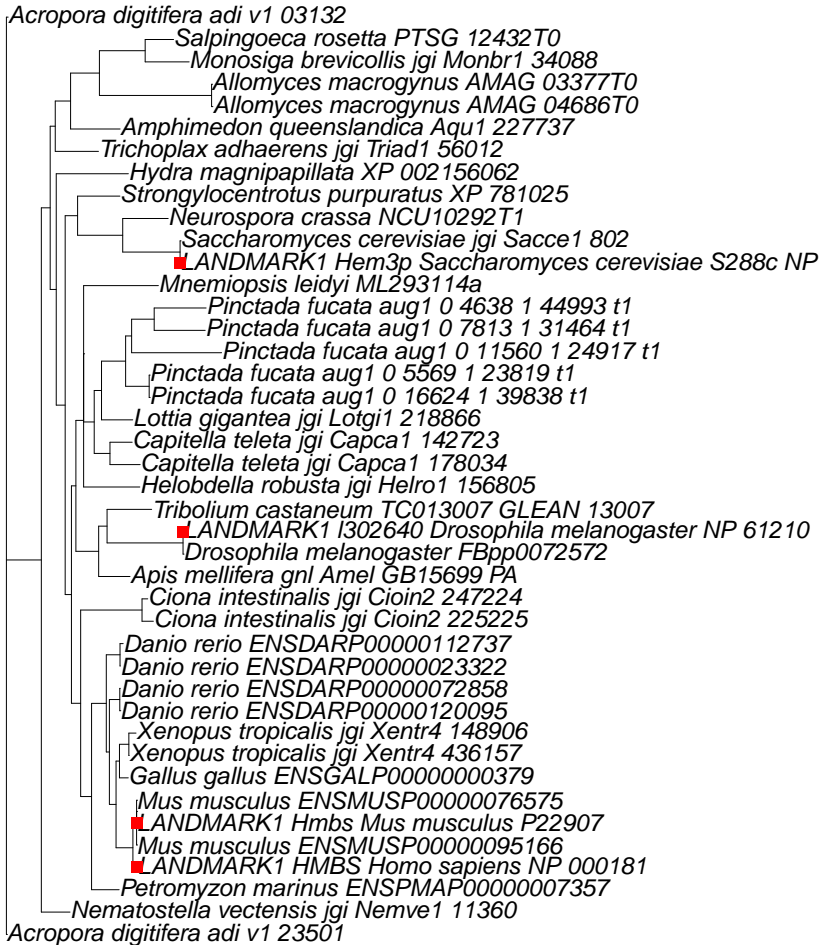

# Tree File: Urod

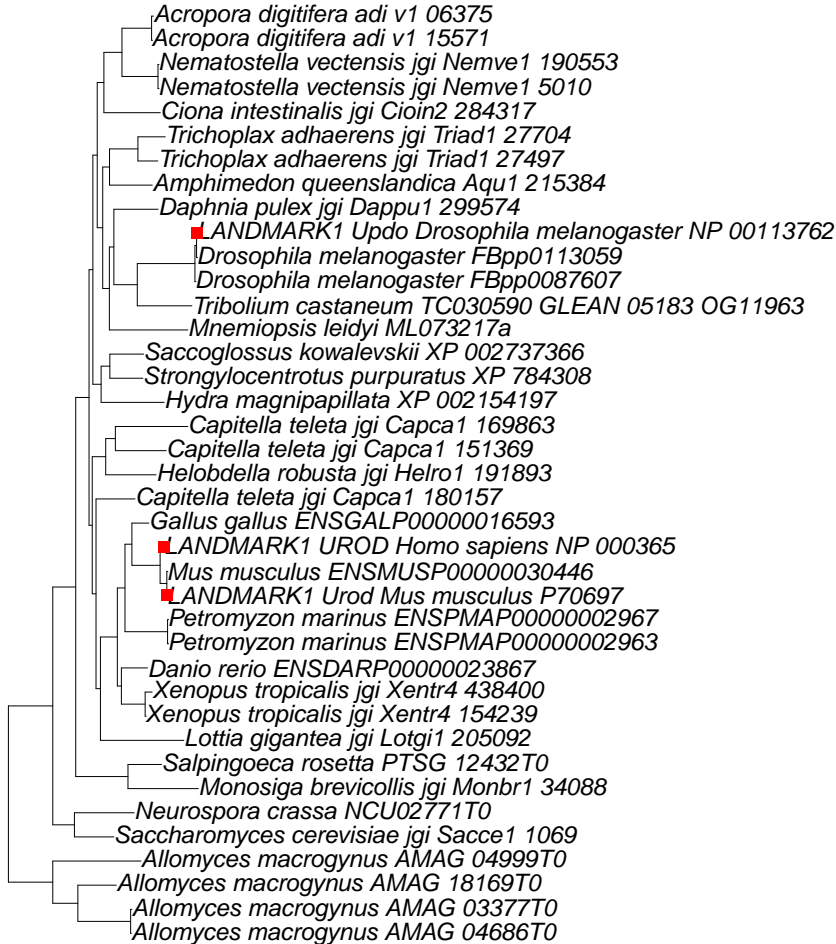

# Tree File: reflectin\_1a

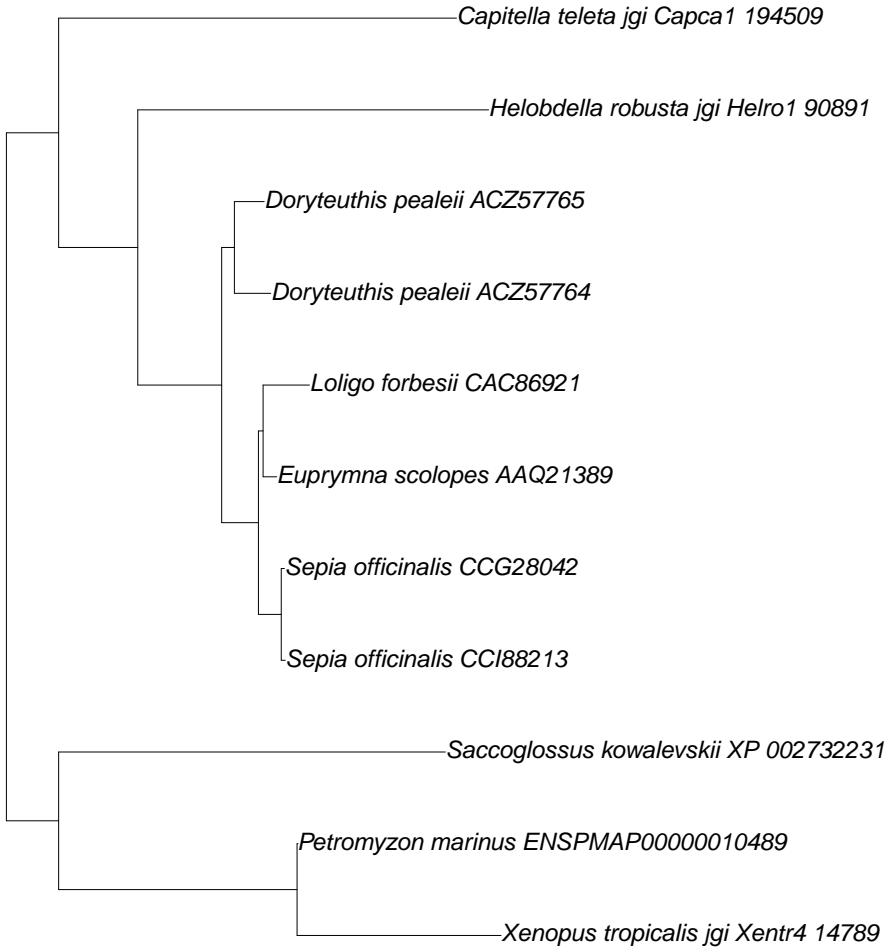

# Tree File: A\_crys

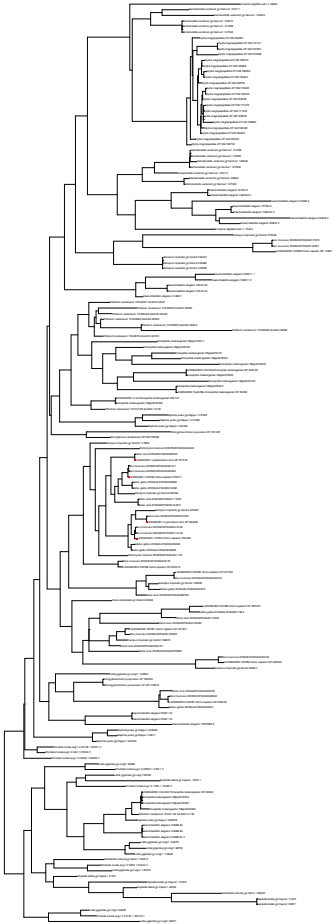

# Tree File: J1\_crys

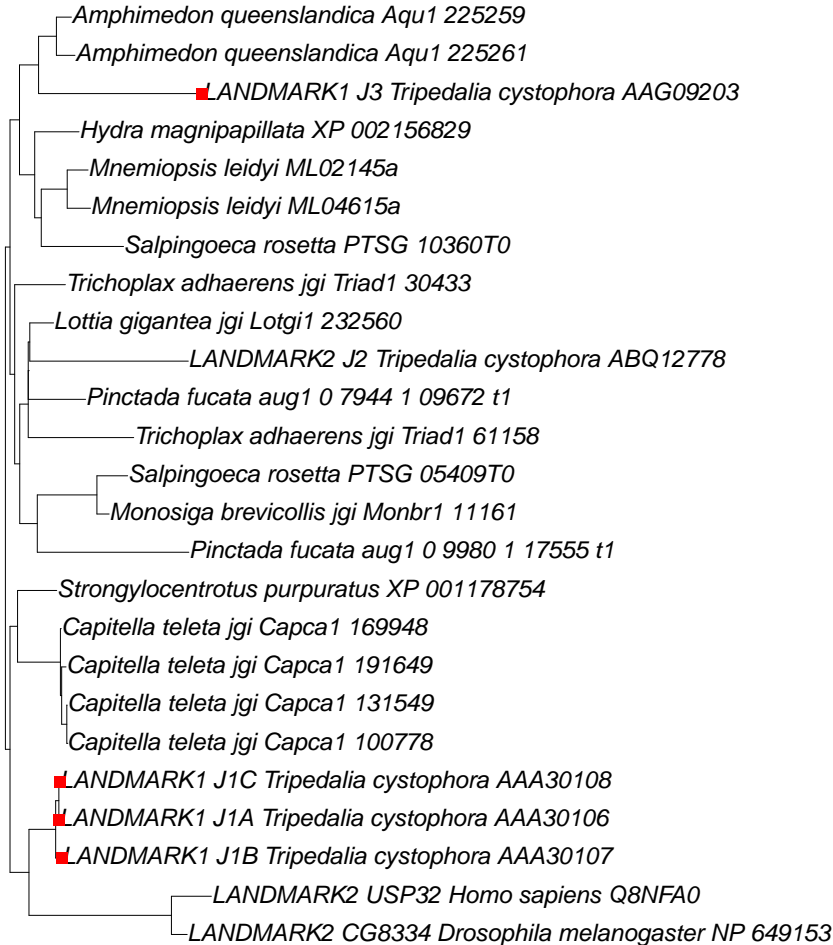

# Tree File: S\_crys

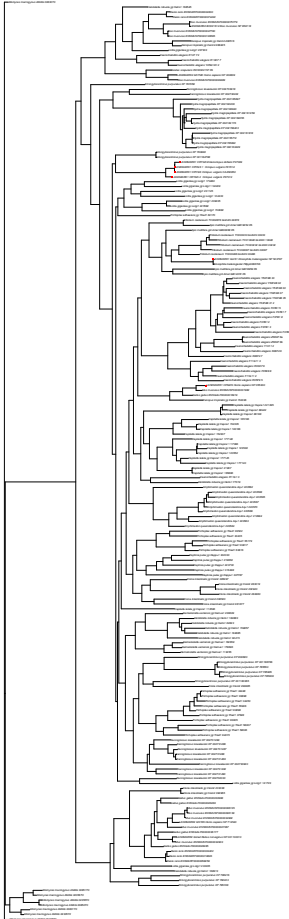

# Tree File: B\_crys

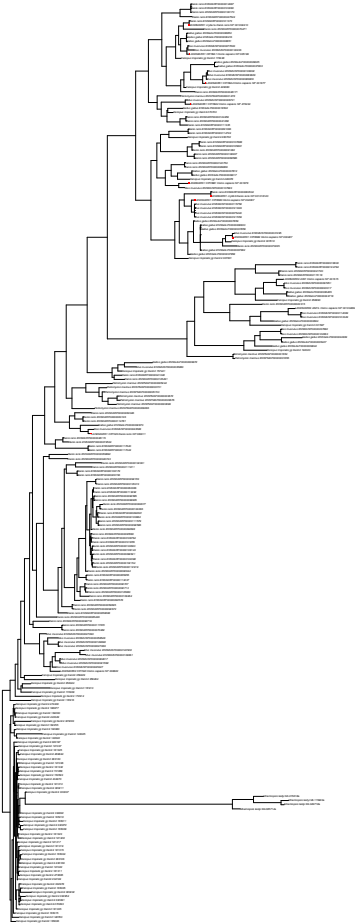

Tree File: O\_crys

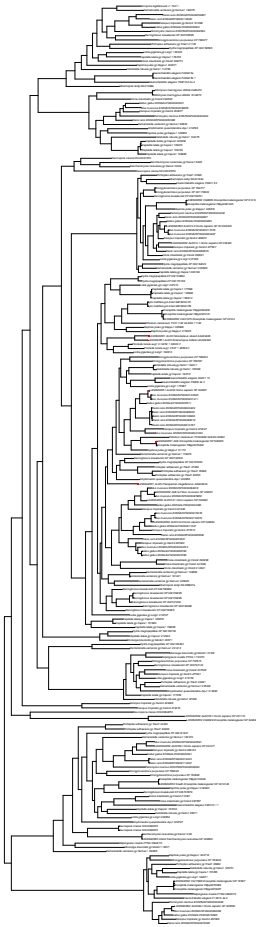





# Tree File: period

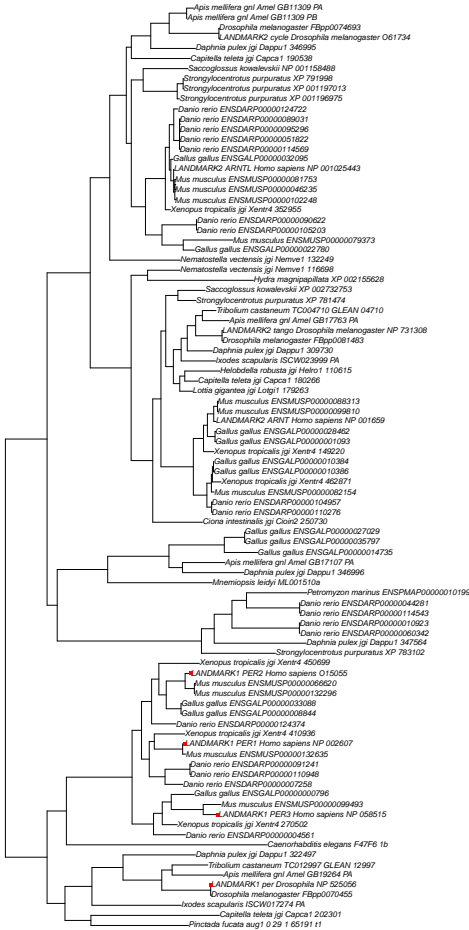

# Tree File: cwo

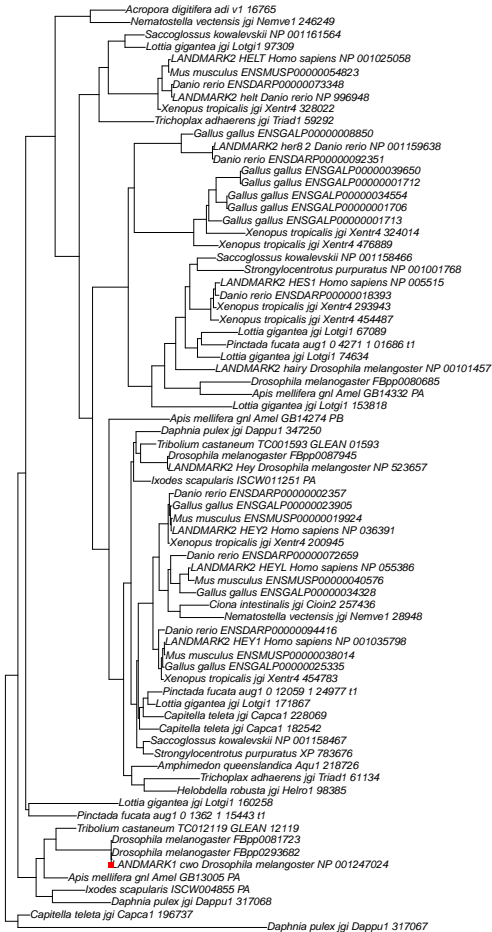

# Tree File: cycle

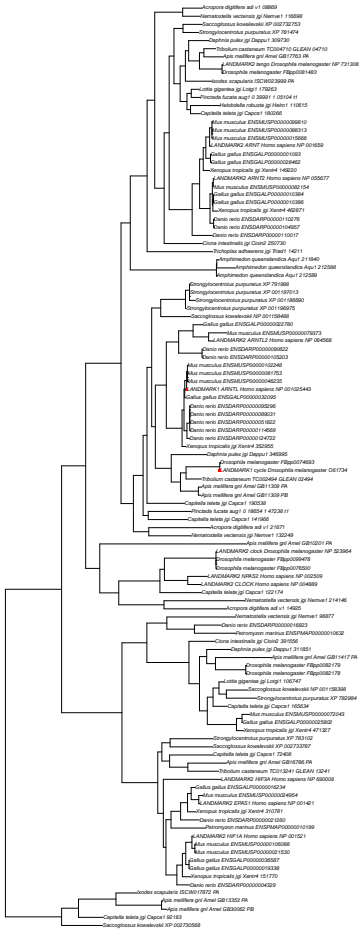

# Tree File: lark

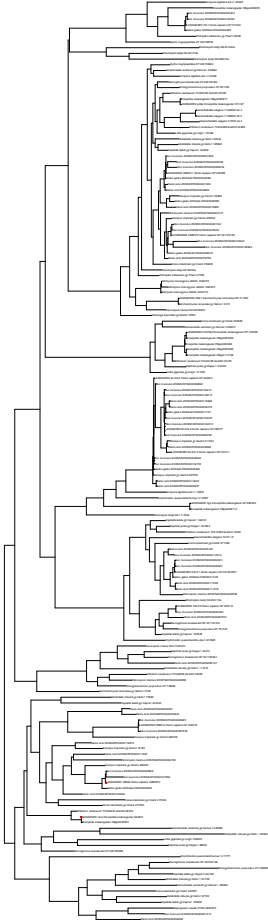



# Tree File: pdf

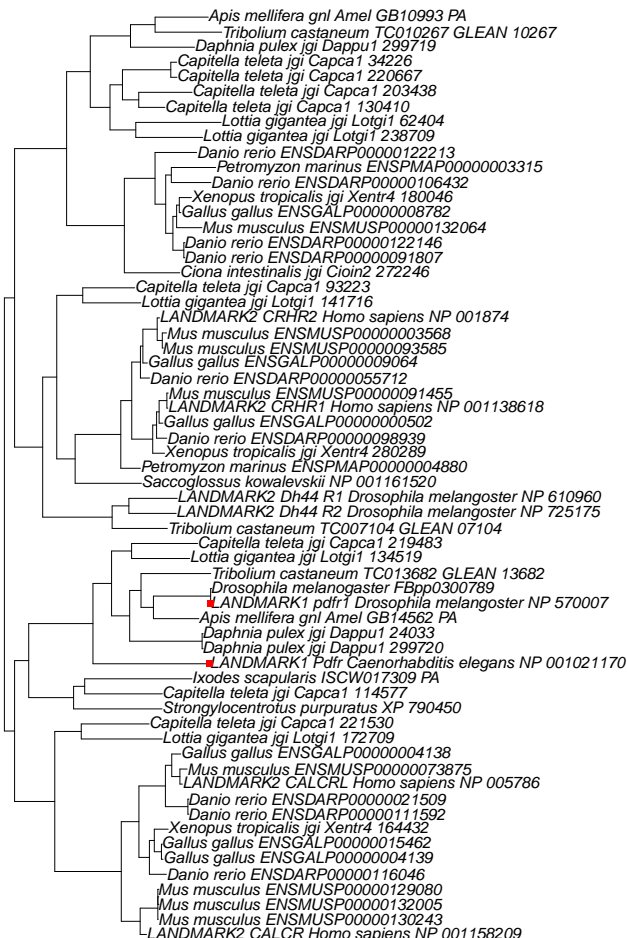

# Tree File: par

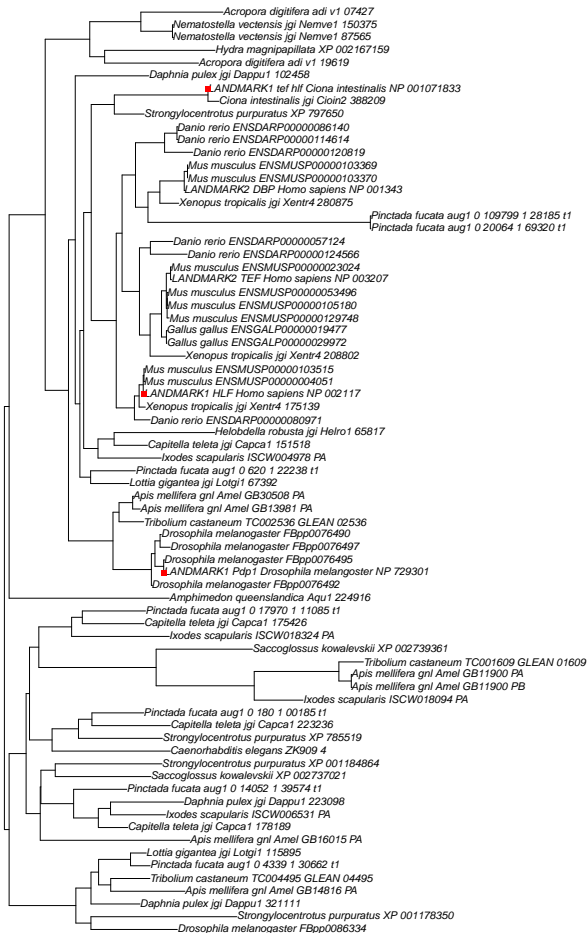



# Tree File: slo

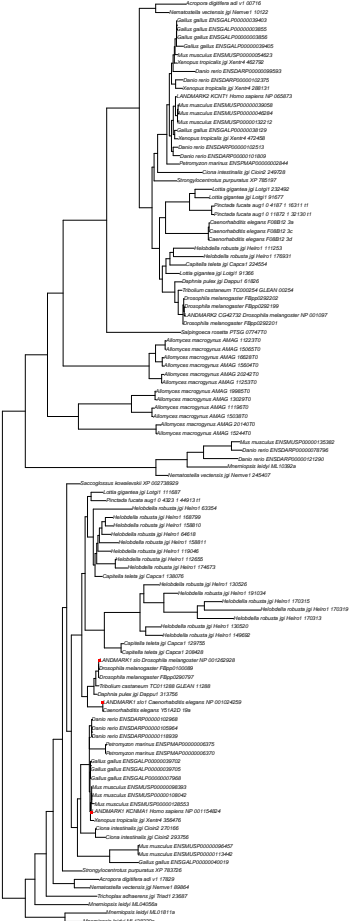

# Tree File: cry2

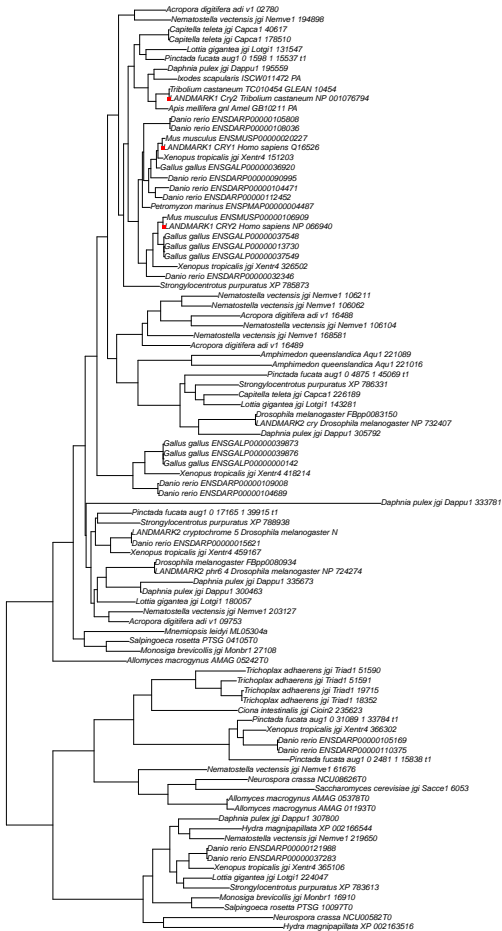

# Tree File: timeless

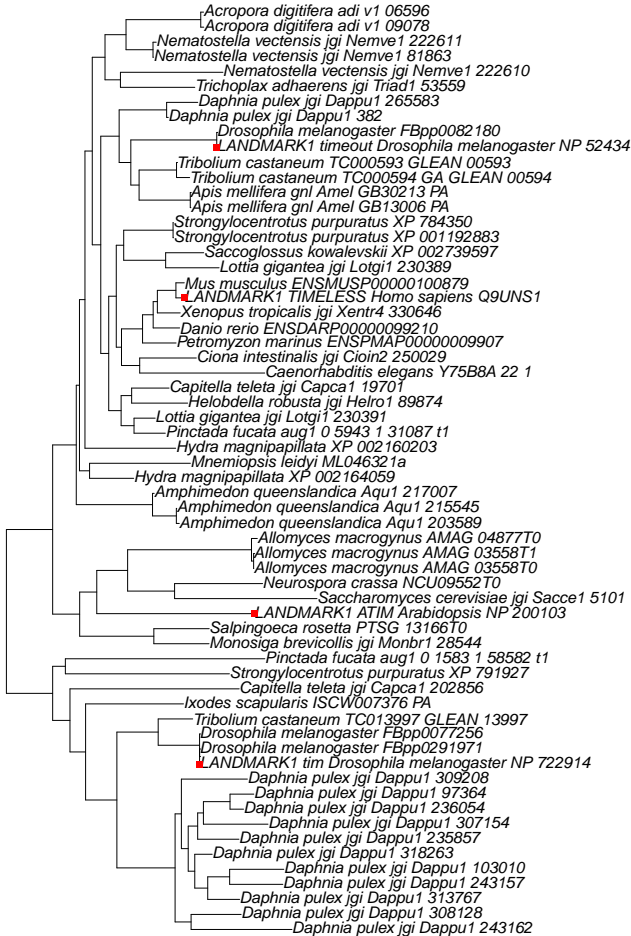

# Tree File: clock

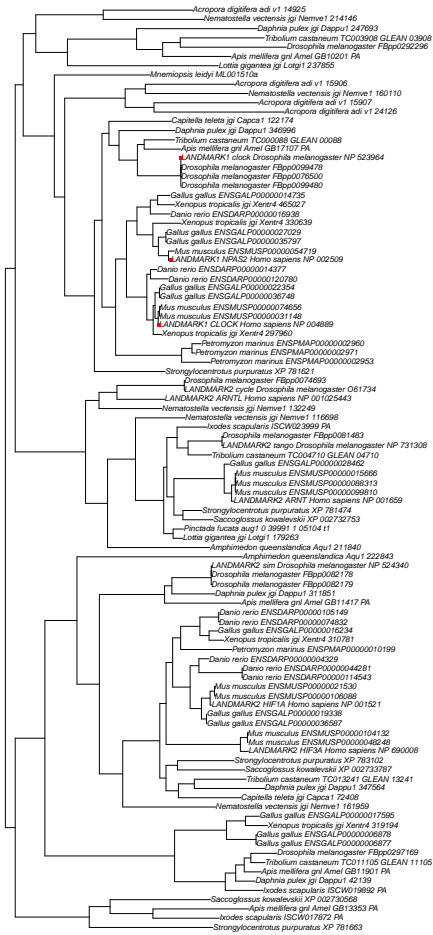

# Tree File: tango

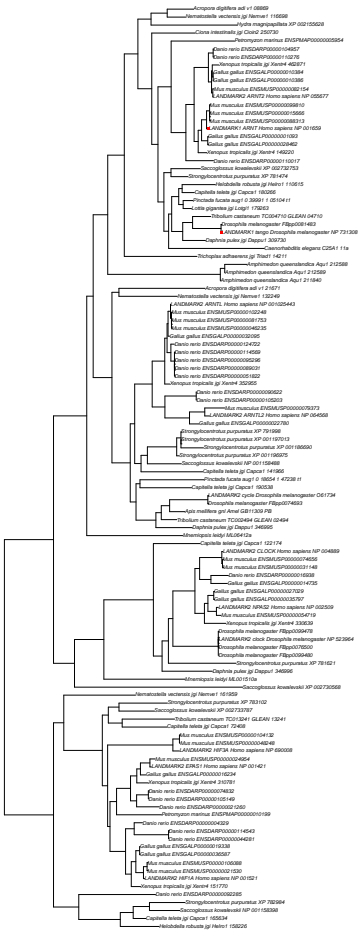

Supplement: 12859_2014_350_MOESM2_ESM.pdf [file 12859_2014_350_MOESM2_ESM.pdf]
